# Supplementary material
Source: PubMed Central journal article supplement (PMC7159295)
Supplement: mmc1.pdf [file mmc1.pdf]

# THE LANCET

## **Supplementary appendix**

This appendix formed part of the original submission and has been peer reviewed.  
We post it as supplied by the authors.

Supplement to: Wirtz VJ, Hogerzeil HV, Gray AL, et al. Essential medicines for universal health coverage. *Lancet* 2016; published online Nov 7. [http://dx.doi.org/10.1016/S0140-6736\(16\)31599-9](http://dx.doi.org/10.1016/S0140-6736(16)31599-9).

## Webappendix:

### Essential medicines for Universal Health Coverage

#### Contents

| Appendix | Title                                                                                                                                                  | Page |
|----------|--------------------------------------------------------------------------------------------------------------------------------------------------------|------|
| 1.1      | Medicine list (in alphabetical order), and sources of quantity estimation data for Scenarios 1-4                                                       | 3    |
| 1.2      | Detailed methods for costing exercise                                                                                                                  | 19   |
| 1.3      | Assumptions                                                                                                                                            | 23   |
| 1.4      | Treatment coverage assumptions                                                                                                                         | 26   |
|          | Table A1.4.1: Percentage of patients with each condition estimated to be on treatment, in high-income countries (“treatment coverage”)                 | 26   |
|          | Table A1.4.2: Medicine coverage: percent of patients with a condition estimated on each listed drug                                                    | 27   |
|          | Appendix 1.4 – Reference List                                                                                                                          | 28   |
| 1.5      | Table: Total pharmaceutical expenditure as percentage of Gross Domestic Product (GDP), 2010                                                            | 30   |
| 1.6      | Panel: The Lancet Commission on Essential Medicines Policies                                                                                           | 30   |
| 2.2      | HITAP Assessment Process                                                                                                                               | 31   |
| 2.3      | Figure 5 Definitions                                                                                                                                   | 32   |
| 3.1      | Figure: Examples of falsified artemisinin-combination products found in Africa                                                                         | 33   |
| 3.2      | Figure: Number of Low- and Middle-Income countries (LMIC) in the International Programme for International Drug Monitoring (1968-2015)                 | 33   |
| 3.3      | Table: Essential Medicines Regulatory Functions                                                                                                        | 34   |
| 4        | Table A4.1: Evidence from high quality systematic reviews about effectiveness of interventions targeting health professionals *                        | 35   |
|          | Table A4.2: Evidence from high quality systematic reviews about effectiveness of interventions to improve use of medicines by patients and consumers * | 37   |
|          | Reference List                                                                                                                                         | 39   |
| 4.1      | Table: World Health Assembly resolutions related to medicines use                                                                                      | 42   |
| 4.2      | Table 4: Seven dimensions and elements in routine data                                                                                                 | 44   |
| 4.3      | Instagram post by Kim Kardashian promoting a morning sickness medication                                                                               | 45   |
| 5        | The patent-based innovation system has been globalized                                                                                                 | 46   |
| 6        | Complementary Indicators                                                                                                                               | 47   |



**Appendix 1.1: Medicine list (in alphabetical order), and sources of quantity estimation data for Scenarios 1-4**

| Item ID | Compound            | Formulation   | Strength      | Scenario 1 source | Scenario 2 source | Scenario 3 source | Scenario 4 source |
|---------|---------------------|---------------|---------------|-------------------|-------------------|-------------------|-------------------|
| 339     | Abacavir            | Oral solution | 20mg/mL       | Forecast*         | Forecast*         | Forecast*         | Forecast*         |
| 340     | Abacavir            | tablet        | 300mg         | Forecast          | Forecast          | Forecast          | Forecast          |
| 341     | Abacavir            | tablet        | 60mg          | Forecast*         | Forecast*         | Forecast*         | Forecast*         |
| 349     | Abacavir/lamivudine | tablet        | 600/300       | Forecast          | Forecast          | Forecast          | Forecast          |
| 476     | Abacavir/Lamivudine | Tablet        | 60 mg / 30 mg | Forecast          | Forecast          | Forecast          | Forecast          |
| 477     | Abacavir/Lamivudine | Tablet        | 120mg / 60mg  | Forecast*         | Forecast*         | Forecast*         | Forecast*         |
| 463     | Acetazolamide       | tablet        | 250mg         | Denmark           | KZN               | Denmark           | KZN               |
| 462     | Acetylcholine       | Eye drop      | 10mg/mL       | Prevalence        | Prevalence        | Prevalence        | Prevalence        |
| 325     | Aciclovir           | Oral solution | 40 mg/mL      | Prevalence        | Prevalence        | Prevalence        | Prevalence        |
| 326     | Aciclovir           | tablet        | 200mg         | Prevalence        | Prevalence        | Prevalence        | Prevalence        |
| 327     | Aciclovir           | tablet        | 400mg         | Prevalence        | Prevalence        | Prevalence        | Prevalence        |
| 328     | Aciclovir           | Vial          | 250mg         | Prevalence        | Prevalence        | Prevalence        | Prevalence        |
| 199     | Acitretin           | Capsule       | 10mg          | Denmark           | Denmark           | Denmark           | Denmark           |
| 437     | Albendazole         | suspension    | 20 mg/mL      | KZN               | KZN               | KZN               | KZN               |
| 438     | Albendazole         | tablet        | 400mg         | KZN               | KZN               | KZN               | KZN               |
| 365     | Allopurinol         | tablet        | 100mg         | Prevalence        | Prevalence        | Prevalence        | Prevalence        |
| 366     | Allopurinol         | tablet        | 300mg         | Prevalence        | Prevalence        | Prevalence        | Prevalence        |
| 297     | Amikacin            | vial          | 250mg         | Forecast          | KZN               | IMS               | IMS               |
| 160     | Amiodarone          | tablet        | 200mg         | Denmark           | Denmark           | Denmark           | Denmark           |
| 419     | Amitriptyline       | tablet        | 10mg          | Prevalence        | KZN               | Prevalence        | KZN               |
| 420     | Amitriptyline       | tablet        | 25mg          | Prevalence        | KZN               | Prevalence        | KZN               |
| 421     | Amitriptyline       | tablet        | 50mg          | Prevalence        | KZN*              | Prevalence        | KZN*              |
| 179     | Amlodipine          | tablet        | 10mg          | Denmark           | KZN               | IMS               | IMS               |
| 180     | Amlodipine          | tablet        | 5mg           | Denmark           | KZN               | IMS               | IMS               |
| 251     | Amoxicillin         | tablet        | 250mg         | KZN               | KZN               | IMS               | IMS               |
| 252     | Amoxicillin         | tablet        | 500mg         | KZN               | KZN               | IMS               | IMS               |

| Item ID | Compound                    | Formulation         | Strength        | Scenario 1 source | Scenario 2 source | Scenario 3 source | Scenario 4 source |
|---------|-----------------------------|---------------------|-----------------|-------------------|-------------------|-------------------|-------------------|
| 253     | Amoxicillin                 | suspension          | 125mg/5mL       | KZN               | KZN               | IMS               | IMS               |
| 254     | Amoxicillin                 | suspension          | 250mg/5mL       | KZN               | KZN               | IMS               | IMS               |
| 264     | Amoxicillin/clavulanic acid | suspension          | 125/31.25mg/5mL | KZN               | KZN               | IMS               | IMS               |
| 265     | Amoxicillin/clavulanic acid | suspension          | 250/62.5mg/5mL  | KZN               | KZN               | IMS               | IMS               |
| 266     | Amoxicillin/clavulanic acid | tablet              | 250/125mg       | KZN               | KZN               | IMS               | IMS               |
| 248     | Ampicillin                  | tablet              | 500mg           | KZN*              | KZN*              | IMS               | IMS               |
| 249     | Ampicillin                  | vial                | 500mg/vial      | KZN               | KZN               | IMS               | IMS               |
| 250     | Ampicillin (as sodium)      | vial                | 250mg           | KZN*              | KZN*              | IMS               | IMS               |
| 432     | Artemether/lumefantrine     | tablet              | 20/120mg        | Forecast          | Forecast          | Forecast          | Forecast          |
| 141     | Aspirin                     | tablet              | 100mg           | Denmark           | KZN               | Denmark           | KZN               |
| 378     | Aspirin                     | tablet              | 300mg           | Denmark           | KZN               | Denmark           | KZN               |
| 332     | Atazanavir                  | capsules            | 150mg           | Forecast          | Forecast          | Forecast          | Forecast          |
| 177     | Atenolol                    | tablet              | 100mg           | Denmark           | KZN               | IMS               | IMS               |
| 178     | Atenolol                    | tablet              | 50mg            | Denmark           | KZN               | IMS               | IMS               |
| 192     | Atorvastatin                | tablet              | 10mg            | Denmark           | KZN               | IMS               | IMS               |
| 110     | Atropine                    | ampoule             | 0.5mg/mL        | Denmark           | KZN               | Denmark           | KZN               |
| 111     | Atropine                    | ampoule             | 1mg/mL          | Denmark           | KZN*              | Denmark           | KZN               |
| 464     | Atropine                    | eye drops           | 1%              | KZN               | KZN               | KZN               | KZN               |
| 361     | Azathioprine                | tablet              | 50mg            | Denmark           | KZN               | Denmark           | KZN               |
| 289     | Azithromycin                | tablet              | 250mg           | KZN               | KZN               | IMS               | IMS               |
| 290     | Azithromycin                | tablet              | 500mg           | KZN               | KZN               | IMS               | IMS               |
| 291     | Azithromycin                | powder for infusion | 250mg           | KZN               | KZN               | IMS               | IMS               |
| 446     | Beclomethasone              | inhaler             | 50 mcg          | Prevalence        | KZN               | Prevalence        | KZN               |
| 447     | Beclomethasone              | inhaler             | 250mcg/dose     | Prevalence        | KZN*              | Prevalence        | KZN*              |
| 448     | Beclomethasone              | inhaler             | 100 mcg         | Prevalence        | KZN               | Prevalence        | KZN               |
| 261     | Benzathine penicillin G     | vial                | 0.72mg (1.2 MU) | KZN               | KZN               | KZN               | KZN               |
| 262     | Benzathine penicillin G     | vial                | 1.44mg (2.4 MU) | KZN               | KZN               | KZN               | KZN               |

| Item ID | Compound          | Formulation                 | Strength  | Scenario 1 source | Scenario 2 source | Scenario 3 source | Scenario 4 source |
|---------|-------------------|-----------------------------|-----------|-------------------|-------------------|-------------------|-------------------|
| 213     | Benzoyl peroxide  | gel                         | 5%        | Denmark           | KZN               | Denmark           | KZN               |
| 441     | Benzyl benzoate   | emulsion                    | 25%       | KZN*              | KZN*              | KZN*              | KZN*              |
| 255     | Benzylpenicillin  | vial                        | 3000mg    | KZN               | KZN               | KZN               | KZN               |
| 256     | Benzylpenicillin  | vial                        | 600mg     | KZN               | KZN               | KZN               | KZN               |
| 234     | Betamethasone     | ampoule                     | 4mg/mL    | Denmark           | KZN               | Denmark           | KZN               |
| 398     | Biperiden         | tablet                      | 2mg       | Prevalence        | Prevalence        | Prevalence        | Prevalence        |
| 359     | Bleomycin         | vial                        | 15IU/vial | KZN*              | KZN*              | KZN*              | KZN*              |
| 442     | Budesonide        | nasal spray                 | 100mcg    | Denmark           | KZN               | Denmark           | KZN               |
| 449     | Budesonide        | inhaler                     | 100mcg    | Prevalence        | KZN               | Prevalence        | KZN               |
| 450     | Budesonide        | inhaler                     | 200mcg    | Prevalence        | KZN               | Prevalence        | KZN               |
| 451     | Budesonide        | inhaler + spacer            | 100mcg    | Prevalence*       | KZN*              | Prevalence*       | KZN*              |
| 452     | Budesonide        | inhaler + spacer            | 200mcg    | Prevalence*       | KZN*              | Prevalence*       | KZN*              |
| 112     | Butylscopolamine  | syrup                       | 5mg/5mL   | Denmark*          | KZN               | Denmark           | KZN               |
| 113     | Butylscopolamine  | tablet                      | 10mg      | Denmark           | KZN               | Denmark           | KZN               |
| 100     | Calamine BP       | lotion                      | 15%       | KZN               | KZN               | KZN               | KZN               |
| 133     | Calcium carbonate | tablet                      | 420/180mg | Denmark           | KZN               | Denmark           | KZN               |
| 134     | Calcium carbonate | tablet                      | 500mg     | Denmark*          | KZN               | Denmark*          | KZN               |
| 131     | Calcium gluconate | ampoule                     | 100mg/mL  | Denmark*          | KZN               | Denmark*          | KZN               |
| 132     | Calcium gluconate | tablet                      | 300mg     | Denmark           | KZN*              | Denmark           | KZN*              |
| 312     | Capreomycin       | vial                        | 1000mg    | Forecast          | Forecast          | Forecast          | Forecast          |
| 391     | Carbamazepine     | tablet                      | 200mg     | Prevalence        | KZN               | IMS               | IMS               |
| 392     | Carbamazepine     | tablet (controlled release) | 200mg     | Prevalence        | KZN               | IMS               | IMS               |
| 393     | Carbamazepine     | tablet (controlled release) | 400mg     | Prevalence        | KZN               | IMS               | IMS               |
| 267     | Cefalexin         | capsules                    | 250mg     | KZN               | KZN               | IMS               | IMS               |
| 268     | Cefalexin         | capsules                    | 500mg     | KZN               | KZN               | IMS               | IMS               |
| 269     | Cefalexin         | suspension                  | 125mg/5mL | KZN               | KZN               | IMS               | IMS               |
| 270     | Cefalexin         | suspension                  | 250mg/5mL | KZN               | KZN               | IMS               | IMS               |

| Item ID | Compound              | Formulation        | Strength   | Scenario 1 source | Scenario 2 source | Scenario 3 source | Scenario 4 source |
|---------|-----------------------|--------------------|------------|-------------------|-------------------|-------------------|-------------------|
| 276     | Cefixime              | suspension         | 100mg/5ml  | KZN*              | KZN*              | IMS               | IMS               |
| 277     | Cefixime              | tablet             | 200mg      | KZN*              | KZN*              | IMS               | IMS               |
| 278     | Cefixime              | tablet             | 400mg      | KZN               | KZN               | IMS               | IMS               |
| 271     | Cefotaxime            | vial               | 1g         | KZN               | KZN               | IMS               | IMS               |
| 272     | Cefoxatime            | vial               | 500mg/vial | KZN               | KZN               | IMS               | IMS               |
| 273     | Ceftriaxone           | vial               | 1g         | KZN               | KZN               | IMS               | IMS               |
| 274     | Ceftriaxone           | vial               | 250mg/vial | KZN               | KZN               | IMS               | IMS               |
| 275     | Ceftriaxone           | vial               | 500mg/vial | KZN               | KZN               | IMS               | IMS               |
| 245     | Chloramphenicol       | capsules           | 250mg      | KZN               | KZN               | IMS               | IMS               |
| 246     | Chloramphenicol       | suspension         | 30mg/mL    | KZN*              | KZN*              | IMS               | IMS               |
| 247     | Chloramphenicol       | injection          | 1g         | KZN*              | KZN*              | IMS               | IMS               |
| 465     | Chloramphenicol       | eye ointment       | 1%         | KZN               | KZN               | KZN               | KZN               |
| 204     | Chlorhexidine         | solution (scrub)   | 4%         | KZN               | KZN               | KZN               | KZN               |
| 205     | Chlorhexidine         | solution (scrub)   | 4%         | KZN               | KZN               | KZN               | KZN               |
| 206     | Chlorhexidine/alcohol | solution (topical) | 0.50%      | KZN               | KZN               | KZN               | KZN               |
| 207     | Chlorhexidine/alcohol | solution (topical) | 0.5/70%    | KZN               | KZN               | KZN               | KZN               |
| 427     | Chloroquine           | syrup              | 50mg/5mL   | Forecast*         | Forecast*         | Forecast*         | Forecast*         |
| 428     | Chloroquine           | tablet             | 150mg      | Forecast          | Forecast          | Forecast          | Forecast          |
| 457     | Chlorphenamine        | syrup              | 2mg/5mL    | Denmark           | KZN               | Denmark           | KZN               |
| 400     | Chlorpromazine        | injection          | 25MG/mL    | Prevalence        | KZN               | Prevalence        | KZN               |
| 401     | Chlorpromazine        | tablet             | 100mg      | Prevalence        | KZN               | Prevalence        | KZN               |
| 402     | Chlorpromazine        | tablet             | 25mg       | Prevalence        | KZN               | Prevalence        | KZN               |
| 403     | Chlorpromazine        | tablet             | 50mg       | Prevalence        | KZN               | Prevalence        | KZN               |
| 300     | Ciprofloxacin         | suspension         | 250mg/5mL  | KZN               | KZN               | IMS               | IMS               |
| 301     | Ciprofloxacin         | tablet             | 250mg      | KZN               | KZN               | IMS               | IMS               |
| 302     | Ciprofloxacin         | tablet             | 500mg      | KZN               | KZN               | IMS               | IMS               |
| 460     | Ciprofloxacin         | eye drops          | 0.30%      | Denmark           | KZN               | Denmark           | KZN               |

| Item ID | Compound                 | Formulation      | Strength   | Scenario 1 source | Scenario 2 source | Scenario 3 source | Scenario 4 source |
|---------|--------------------------|------------------|------------|-------------------|-------------------|-------------------|-------------------|
| 292     | Clindamycin              | ampoule          | 300mg/2mL  | KZN               | KZN               | IMS               | IMS               |
| 293     | Clindamycin              | capsules         | 150mg      | KZN               | KZN               | IMS               | IMS               |
| 101     | Clobetasol               | topical ointment | 0.50%      | Denmark           | Denmark           | Denmark           | Denmark           |
| 322     | Clofazimine              | capsule          | 100mg      | Prevalence        | Prevalence        | Prevalence        | Prevalence        |
| 323     | Clofazimine              | capsule          | 50mg       | Prevalence*       | Prevalence*       | Prevalence*       | Prevalence*       |
| 418     | Clomipramine             | tablet           | 10mg       | Prevalence        | KZN               | Prevalence        | KZN               |
| 390     | Clonazepam               | tablet           | 2mg        | Prevalence        | KZN               | IMS               | IMS               |
| 280     | Clotrimazole             | cream            | 10mg/g     | KZN               | KZN               | KZN               | KZN               |
| 281     | Clotrimazole             | cream (vaginal)  | 1%         | KZN               | KZN               | KZN               | KZN               |
| 282     | Clotrimazole             | vaginal tablet   | 500mg      | KZN               | KZN               | KZN               | KZN               |
| 263     | Cloxacillin              | tablet           | 500mg      | KZN               | KZN               | IMS               | IMS               |
| 407     | Clozapine                | tablet           | 100mg      | Prevalence        | Prevalence        | Prevalence        | Prevalence        |
| 377     | Codeine                  | tablet           | 30mg       | KZN               | KZN               | KZN               | KZN               |
| 283     | Co-trimoxazole           | suspension       | 240mg/5mL  | KZN               | KZN               | IMS               | IMS               |
| 284     | Co-trimoxazole           | suspension       | 240mg/5mL  | KZN               | KZN               | IMS               | IMS               |
| 285     | Co-trimoxazole           | tablet           | 480mg      | KZN               | KZN               | IMS               | IMS               |
| 357     | Cyclophosphamide         | tablet           | 50mg       | KZN*              | KZN*              | KZN*              | KZN*              |
| 358     | Cyclophosphamide         | vial             | 1g/vial    | KZN*              | KZN*              | KZN*              | KZN*              |
| 324     | Dapsone                  | tablet           | 100mg      | Prevalence        | Prevalence        | Prevalence        | Prevalence        |
| 467     | Deferoxamine             | vial             | 500mg/vial | Denmark           | Denmark           | Denmark           | Denmark           |
| 235     | Dexamethasone            | ampoule          | 4mg/mL     | KZN               | KZN               | KZN               | KZN               |
| 150     | Dextrose (Carbohydrates) | ampoule          | 50%        | Denmark           | KZN               | Denmark           | KZN               |
| 151     | Dextrose (Carbohydrates) | ampoule          | 50%        | Denmark*          | KZN               | Denmark*          | KZN               |
| 412     | Diazepam                 | ampoule          | 5mg/mL     | Denmark           | KZN               | Denmark           | KZN               |
| 413     | Diazepam                 | tablet           | 10mg       | Denmark*          | KZN               | Denmark*          | KZN               |
| 414     | Diazepam                 | tablet           | 2mg        | Denmark           | KZN*              | Denmark           | KZN               |
| 415     | Diazepam                 | tablet           | 5mg        | Denmark           | KZN               | Denmark           | KZN               |



| Item ID | Compound                              | Formulation | Strength      | Scenario 1 source | Scenario 2 source | Scenario 3 source | Scenario 4 source |
|---------|---------------------------------------|-------------|---------------|-------------------|-------------------|-------------------|-------------------|
| 159     | Digoxin                               | tablet      | 0.25mg        | Denmark           | KZN               | Denmark           | KZN               |
| 243     | Doxycycline                           | capsules    | 100mg         | KZN               | KZN               | IMS               | IMS               |
| 345     | Efavirenz                             | capsules    | 200mg         | Forecast*         | Forecast*         | Forecast*         | Forecast*         |
| 346     | Efavirenz                             | capsules    | 50mg          | Forecast*         | Forecast*         | Forecast*         | Forecast*         |
| 347     | Efavirenz                             | capsules    | 600mg         | Forecast          | Forecast          | Forecast          | Forecast          |
| 469     | Efavirenz                             | Tablet      | 200 mg        | Forecast          | Forecast          | Forecast          | Forecast          |
| 351     | Emtricitabine / Tenofovir / Efavirenz | tablet      | 200/300/600mg | Forecast          | Forecast          | Forecast          | Forecast          |
| 186     | Enalapril                             | tablet      | 10mg          | Denmark           | KZN               | IMS               | IMS               |
| 187     | Enalapril                             | tablet      | 20mg          | Denmark           | KZN               | IMS               | IMS               |
| 188     | Enalapril                             | tablet      | 5mg           | Denmark           | KZN               | IMS               | IMS               |
| 139     | Enoxaparin                            | syringe     | 40 mg         | Denmark*          | KZN               | Denmark*          | KZN               |
| 140     | Enoxaparin                            | syringe     | 80mg          | Denmark           | KZN               | Denmark           | KZN               |
| 161     | Epinephrine                           | injection   | 1mg/ml        | Denmark           | KZN               | Denmark           | KZN               |
| 214     | Ergometrine                           | ampoule     | 0.5mg/mL      | KZN               | KZN               | KZN               | KZN               |
| 286     | Erythromycin                          | suspension  | 125mg/5mL     | KZN               | KZN               | IMS               | IMS               |
| 287     | Erythromycin                          | suspension  | 250mg/5mL     | KZN               | KZN               | IMS               | IMS               |
| 288     | Erythromycin                          | tablet      | 400mg         | KZN*              | KZN*              | IMS               | IMS               |
| 317     | Ethambutol                            | tablet      | 400mg         | Forecast          | Forecast          | Forecast          | Forecast          |
| 315     | Ethionamide                           | tablet      | 250mg         | Forecast          | Forecast          | Forecast          | Forecast          |
| 144     | Ferrous sulfate                       | oral drops  | 125mg/mL      | Prevalence        | Prevalence        | Prevalence        | Prevalence        |
| 145     | Ferrous sulfate                       | syrup       | 200mg/5mL     | Prevalence*       | Prevalence*       | Prevalence*       | Prevalence*       |
| 146     | Ferrous sulfate                       | tablet      | 50mg          | Prevalence*       | Prevalence*       | Prevalence*       | Prevalence*       |
| 147     | Ferrous sulfate                       | tablet      | 170mg         | Prevalence        | Prevalence        | Prevalence        | Prevalence        |
| 306     | Fluconazole                           | capsules    | 200mg         | KZN               | KZN               | KZN               | KZN               |
| 307     | Fluconazole                           | capsules    | 50mg          | KZN               | KZN               | KZN               | KZN               |
| 308     | Fluconazole                           | injection   | 2mg/mL        | KZN               | KZN               | KZN               | KZN               |
| 422     | Fluoxetine                            | capsules    | 20mg          | Prevalence        | KZN               | Prevalence        | KZN               |

| Item ID | Compound                               | Formulation                 | Strength    | Scenario 1 source | Scenario 2 source | Scenario 3 source | Scenario 4 source |
|---------|----------------------------------------|-----------------------------|-------------|-------------------|-------------------|-------------------|-------------------|
| 404     | Fluphenazine                           | ampoule                     | 25 mg/mL    | Prevalence        | Prevalence        | Prevalence        | Prevalence        |
| 148     | Folic acid                             | tablet                      | 1mg         | Denmark           | KZN*              | Denmark           | KZN*              |
| 149     | Folic acid                             | tablet                      | 5mg         | Denmark           | KZN               | Denmark           | KZN               |
| 329     | Ganciclovir                            | powder for injection        | 500mg/10mL  | KZN               | KZN               | KZN               | KZN               |
| 295     | Gentamicin                             | ampoule                     | 40mg/mL     | KZN               | KZN               | IMS               | IMS               |
| 296     | Gentamicin                             | eye drops                   | 3mg/ml      | KZN               | KZN               | KZN               | KZN               |
| 128     | Glibenclamide                          | tablet                      | 5mg         | Prevalence        | Prevalence        | Prevalence        | Prevalence        |
| 129     | Gliclazide                             | tablet                      | 80mg        | Prevalence        | Prevalence        | Prevalence        | Prevalence        |
| 162     | Glyceryl trinitrate                    | sublingual capsule          | 0.4mg       | Denmark           | KZN               | Denmark           | KZN               |
| 163     | Glyceryl trinitrate                    | tablet                      | 6.4mg       | Denmark*          | KZN               | Denmark*          | KZN               |
| 164     | Glyceryl trinitrate                    | tablet SR                   | 2.6mg       | Denmark           | KZN*              | Denmark           | KZN*              |
| 405     | Haloperidol                            | capsules                    | 0.5mg       | Prevalence        | Prevalence        | Prevalence        | Prevalence        |
| 406     | Haloperidol                            | tablet                      | 1.5mg       | Prevalence        | Prevalence        | Prevalence        | Prevalence        |
| 169     | Hydralazine                            | tablet                      | 25mg        | KZN               | KZN               | IMS               | IMS               |
| 170     | Hydrochlorothiazide                    | tablet                      | 12.5mg      | Denmark           | KZN               | IMS               | IMS               |
| 171     | Hydrochlorothiazide                    | tablet                      | 25mg        | Denmark           | KZN               | IMS               | IMS               |
| 203     | Hydrocortisone                         | cream                       | 1%          | KZN               | KZN               | KZN               | KZN               |
| 239     | Hydrocortisone                         | tablet                      | 10mg        | Denmark           | KZN               | Denmark           | KZN               |
| 240     | Hydrocortisone                         | injection                   | 100mg/8ml   | Denmark           | KZN               | Denmark           | KZN               |
| 362     | Ibuprofen                              | suspension                  | 100mg/5mL   | Denmark*          | KZN               | IMS               | IMS               |
| 363     | Ibuprofen                              | tablet                      | 200mg       | Denmark           | KZN               | IMS               | IMS               |
| 364     | Ibuprofen                              | tablet                      | 400mg       | Denmark           | KZN               | IMS               | IMS               |
| 279     | Imipenem plus cilastatin               | vial (powder for injection) | 500mg/500mg | KZN               | KZN               | IMS               | IMS               |
| 355     | Immunoglobulin, Anti-D rhesus          | ampoule                     | 100mcg      | Denmark           | Denmark           | Denmark           | Denmark           |
| 125     | Insulin combined                       | prefilled syringe           | 100IU/mL    | Prevalence        | Prevalence        | Prevalence        | Prevalence        |
| 126     | Insulin combined                       | vial                        | 100IU/mL    | Prevalence        | Prevalence        | Prevalence        | Prevalence        |
| 123     | Insulin isophane (intermediate acting) | prefilled syringe           | 100IU/mL    | Prevalence        | Prevalence        | Prevalence        | Prevalence        |

| Item ID | Compound                                      | Formulation               | Strength                               | Scenario 1 source | Scenario 2 source | Scenario 3 source | Scenario 4 source |
|---------|-----------------------------------------------|---------------------------|----------------------------------------|-------------------|-------------------|-------------------|-------------------|
| 124     | Insulin isophane (intermediate acting)        | vial                      | 100IU/mL                               | Prevalence        | Prevalence        | Prevalence        | Prevalence        |
| 121     | Insulin, soluble (fast acting)                | prefilled syringe         | 100IU/mL                               | Prevalence        | Prevalence        | Prevalence        | Prevalence        |
| 122     | Insulin, soluble (fast acting)                | vial                      | 100IU/mL                               | Prevalence        | Prevalence        | Prevalence        | Prevalence        |
| 453     | Ipratropium                                   | inhaler                   | 40mcg/dose                             | Prevalence        | KZN               | Prevalence        | KZN               |
| 454     | Ipratropium                                   | vial, inhalation solution | 0.5mg/2mL                              | Prevalence        | KZN               | Prevalence        | KZN               |
| 367     | Isoflurane USP                                | liquid for vaporization   | 0.999                                  | Denmark*          | KZN*              | Denmark*          | KZN*              |
| 368     | Isoflurane USP                                | liquid for vaporization   | 0.999                                  | Denmark           | KZN               | Denmark           | KZN               |
| 313     | Isoniazid                                     | tablet                    | 100mg                                  | Forecast          | Forecast          | Forecast          | Forecast          |
| 314     | Isoniazid                                     | tablet                    | 300mg                                  | Forecast          | Forecast          | Forecast          | Forecast          |
| 165     | Isosorbide dinitrate                          | tablet                    | 10mg                                   | Denmark*          | KZN               | IMS               | IMS               |
| 166     | Isosorbide dinitrate                          | tablet                    | 5mg                                    | Denmark           | KZN*              | IMS               | IMS               |
| 167     | Isosorbide dinitrate                          | tablet SR                 | 40mg                                   | Denmark           | KZN*              | IMS               | IMS               |
| 117     | Lactulose                                     | syrup                     | 3.3g/5mL                               | Denmark           | KZN               | Denmark           | KZN               |
| 336     | Lamivudine                                    | oral solution             | 10mg/mL                                | Forecast*         | Forecast*         | Forecast*         | Forecast*         |
| 337     | Lamivudine                                    | tablet                    | 150mg                                  | Forecast*         | Forecast*         | Forecast*         | Forecast*         |
| 338     | Lamivudine                                    | tablet                    | 300mg                                  | Forecast          | Forecast          | Forecast          | Forecast          |
| 354     | Lamivudine, Tenofovir disoproxil, Efavirenz   | tablet                    | 300/300/600mg                          | Forecast          | Forecast          | Forecast          | Forecast          |
| 348     | Lamivudine/zidovudine HCl                     | tablet                    | 300/150mg                              | Forecast          | Forecast          | Forecast          | Forecast          |
| 439     | Levamisole                                    | tablet                    | 50mg                                   | KZN*              | KZN*              | KZN*              | KZN*              |
| 399     | Levodopa/carbidopa                            | tablet                    | 100/25mg                               | Prevalence        | Prevalence        | Prevalence        | Prevalence        |
| 217     | Levonoregestrel/ethinyl oestradiol, Triphasic | tablet                    | 0.05/0.03, 0.075/0.04 and 0.125/0.03mg | KZN               | KZN               | KZN               | KZN               |
| 220     | Levonorgestrel                                | implant                   | 75mg/implant                           | KZN               | KZN               | KZN               | KZN               |
| 221     | Levonorgestrel                                | tablet                    | 0.03mg                                 | KZN               | KZN               | KZN               | KZN               |
| 223     | Levonorgestrel                                | tablet                    | 1.5mg                                  | KZN               | KZN               | KZN               | KZN               |
| 216     | Levonorgestrel/ethinyl oestradiol             | tablet                    | 0.15/0.03mg                            | KZN               | KZN               | KZN               | KZN               |
| 241     | Levothyroxine                                 | tablet                    | 0.05mg                                 | Prevalence        | Prevalence        | Prevalence        | Prevalence        |
| 242     | Levothyroxine                                 | tablet                    | 0.1mg                                  | Prevalence        | Prevalence        | Prevalence        | Prevalence        |

| Item ID | Compound             | Formulation      | Strength         | Scenario 1 source | Scenario 2 source | Scenario 3 source | Scenario 4 source |
|---------|----------------------|------------------|------------------|-------------------|-------------------|-------------------|-------------------|
| 197     | Lidocaine            | gel              | 2%               | Denmark           | KZN               | Denmark           | KZN               |
| 370     | Lidocaine            | vial             | 1%               | Denmark*          | KZN               | Denmark*          | KZN               |
| 371     | Lidocaine            | injection        | 2%               | Denmark           | KZN               | Denmark           | KZN               |
| 372     | Lidocaine/adrenaline | dental cartridge | 2%               | Denmark           | KZN               | Denmark           | KZN               |
| 408     | Lithium carbonate    | tablet           | 250mg            | Prevalence        | Prevalence        | Prevalence        | Prevalence        |
| 409     | Lithium carbonate    | tablet           | 400mg            | Prevalence        | Prevalence        | Prevalence        | Prevalence        |
| 119     | Loperamide           | tablet           | 2mg              | Denmark           | KZN               | Denmark           | KZN               |
| 352     | Lopinavir/ritonavir  | tablet           | 100/25mg         | Forecast*         | Forecast*         | Forecast*         | Forecast*         |
| 353     | Lopinavir/ritonavir  | tablet           | 200/50mg         | Forecast          | Forecast          | Forecast          | Forecast          |
| 472     | Lopinavir/ritonavir  | Tablet           | 100 mg / 25mg    | Forecast          | Forecast          | Forecast          | Forecast          |
| 473     | Lopinavir/ritonavir  | Oral liquid      | 80 mg / 20 mg/ml | Forecast          | Forecast          | Forecast          | Forecast          |
| 416     | Lorazepam            | tablet           | 1mg              | Denmark           | KZN               | Denmark           | KZN               |
| 417     | Lorazepam            | tablet           | 2mg              | Denmark*          | KZN               | Denmark*          | KZN               |
| 189     | Losartan             | tablet           | 50mg             | Denmark           | KZN               | IMS               | IMS               |
| 158     | Magnesium sulphate   | ampoule          | 50%              | KZN               | KZN               | KZN               | KZN               |
| 434     | Mebendazole          | suspension       | 100mg/5mL        | KZN               | KZN               | KZN               | KZN               |
| 435     | Mebendazole          | tablet           | 100mg            | KZN*              | KZN*              | KZN*              | KZN*              |
| 436     | Mebendazole          | tablet           | 500mg            | KZN               | KZN               | KZN               | KZN               |
| 222     | Medroxyprogesterone  | vial             | 150mg/mL         | KZN               | KZN               | KZN               | KZN               |
| 228     | Medroxyprogesterone  | tablet           | 10mg             | Denmark           | KZN*              | Denmark           | KZN*              |
| 229     | Medroxyprogesterone  | tablet           | 5mg              | Denmark*          | KZN               | Denmark*          | KZN               |
| 360     | Medroxyprogesterone  | tablet           | 100mg            | Denmark           | Denmark           | Denmark           | Denmark           |
| 127     | Metformin            | tablet           | 500mg            | Prevalence        | Prevalence        | Prevalence        | Prevalence        |
| 102     | Methyl salicylate    | ointment         | 10%, 25g         | KZN               | KZN               | KZN               | KZN               |
| 168     | Methyldopa           | tablet           | 250mg            | KZN               | KZN               | IMS               | IMS               |
| 236     | Methylprednisolone   | injection        | 40mg/ml          | Denmark           | KZN               | Denmark           | KZN               |
| 114     | Metoclopramide       | ampoule          | 5mg/mL           | Denmark           | KZN               | IMS               | IMS               |

| Item ID | Compound                | Formulation      | Strength           | Scenario 1 source | Scenario 2 source | Scenario 3 source | Scenario 4 source |
|---------|-------------------------|------------------|--------------------|-------------------|-------------------|-------------------|-------------------|
| 115     | Metoclopramide          | syrup            | 5mg/5mL            | Denmark*          | KZN               | IMS               | IMS               |
| 116     | Metoclopramide          | tablet           | 10mg               | Denmark           | KZN               | IMS               | IMS               |
| 423     | Metronidazole           | suspension       | 200mg/5mL          | KZN               | KZN               | IMS               | IMS               |
| 424     | Metronidazole           | tablet           | 200mg              | KZN*              | KZN*              | IMS               | IMS               |
| 425     | Metronidazole           | tablet           | 400mg              | KZN               | KZN               | IMS               | IMS               |
| 426     | Metronidazole           | oral suspension  | 125mg/5ml          | KZN*              | KZN*              | IMS               | IMS               |
| 231     | Mifepristone            | tablet           | 200mg              | KZN               | KZN               | KZN               | KZN               |
| 215     | Misoprostol             | tablet           | 200mcg             | KZN               | KZN               | KZN               | KZN               |
| 373     | Morphine                | ampoule          | 10mg               | Forecast          | Forecast          | Forecast          | Forecast          |
| 374     | Morphine                | tablet           | 100mg              | Forecast          | Forecast          | Forecast          | Forecast          |
| 375     | Morphine                | oral solution    | 2 mg/ml            | Forecast          | Forecast          | Forecast          | Forecast          |
| 376     | Morphine                | oral solution    | 2 mg/ml            | Forecast*         | Forecast*         | Forecast*         | Forecast*         |
| 201     | Mupirocin               | topical ointment | 2%                 | Denmark           | KZN               | Denmark           | KZN               |
| 466     | Naloxone                | ampoule          | 0.4mg/mL           | Denmark           | KZN               | Denmark           | KZN               |
| 343     | Nevirapine              | suspension       | 50mg/5mL           | Forecast*         | Forecast*         | Forecast*         | Forecast*         |
| 344     | Nevirapine              | tablet           | 200mg              | Forecast          | Forecast          | Forecast          | Forecast          |
| 470     | Nevirapine              | Tablet           | 50 mg              | Forecast          | Forecast          | Forecast          | Forecast          |
| 471     | Nevirapine              | Oral liquid      | 50 mg / 5mL, 100ml | Forecast          | Forecast          | Forecast          | Forecast          |
| 440     | Niclosamide             | chewable tablet  | 500mg              | KZN               | KZN               | KZN               | KZN               |
| 130     | Nicotinamide            | tablet           | 100mg              | KZN               | KZN               | KZN               | KZN               |
| 193     | Nicotinic acid (Niacin) | tablet           | 100mg              | Denmark*          | Denmark*          | IMS               | IMS               |
| 194     | Nicotinic acid (Niacin) | tablet           | 25mg               | Denmark*          | Denmark*          | IMS               | IMS               |
| 195     | Nicotinic acid (Niacin) | tablet           | 500mg              | Denmark*          | Denmark*          | IMS               | IMS               |
| 181     | Nifedipine              | capsules         | 10mg               | Denmark           | KZN               | IMS               | IMS               |
| 182     | Nifedipine              | capsules         | 5mg                | Denmark*          | KZN               | IMS               | IMS               |
| 183     | Nifedipine XL           | tablet           | 30mg               | Denmark           | KZN               | IMS               | IMS               |
| 184     | Nifedipine XL           | tablet           | 60mg               | Denmark           | KZN*              | IMS               | IMS               |

| Item ID | Compound                  | Formulation   | Strength  | Scenario 1 source | Scenario 2 source | Scenario 3 source | Scenario 4 source |
|---------|---------------------------|---------------|-----------|-------------------|-------------------|-------------------|-------------------|
| 305     | Nitrofurantoin            | suspension    | 25mg/5ml  | KZN               | KZN               | KZN               | KZN               |
| 218     | Norethisterone            | ampoule       | 200mg/mL  | KZN               | KZN               | KZN               | KZN               |
| 219     | Norethisterone            | tablet        | 5mg       | Denmark           | KZN               | Denmark           | KZN               |
| 196     | Nystatin                  | suspension    | 0.1MU/mL  | KZN               | KZN               | KZN               | KZN               |
| 224     | Oestradiol                | tablet        | 2mg       | Denmark           | KZN*              | Denmark           | KZN*              |
| 227     | Oestradiol/norethisterone | tablet        | 1/0.5mg   | KZN               | KZN               | KZN               | KZN               |
| 225     | Oestrogens (conjugated)   | tablet        | 0.3mg     | KZN               | KZN               | KZN               | KZN               |
| 226     | Oestrogens (conjugated)   | tablet        | 1.25mg    | KZN               | KZN               | KZN               | KZN               |
| 298     | Ofloxacin                 | tablet        | 200mg     | KZN*              | KZN*              | IMS               | IMS               |
| 299     | Ofloxacin                 | tablet        | 400mg     | Forecast          | KZN               | IMS               | IMS               |
| 108     | Omeprazole                | capsules      | 20mg      | Prevalence        | KZN               | Prevalence        | KZN               |
| 109     | Omeprazole                | tablet        | 10mg      | Prevalence        | KZN               | Prevalence        | KZN               |
| 118     | Oral rehydration          | sachet        | 20g/L     | KZN               | KZN               | KZN               | KZN               |
| 232     | Oxytocin                  | ampoule       | 10IU/mL   | KZN               | KZN               | KZN               | KZN               |
| 233     | Oxytocin                  | ampoule       | 5IU/mL    | KZN               | KZN               | KZN               | KZN               |
| 379     | Paracetamol               | suppositories | 125mg     | Denmark           | KZN               | Denmark           | KZN               |
| 380     | Paracetamol               | syrup         | 120mg/5mL | Denmark           | KZN               | Denmark           | KZN               |
| 381     | Paracetamol               | tablet        | 500mg     | Denmark           | KZN               | Denmark           | KZN               |
| 382     | Paracetamol               | mL            | 120mg/5mL | Denmark*          | KZN               | Denmark*          | KZN               |
| 383     | Phenobarbital             | tablet        | 100mg     | Prevalence        | KZN*              | IMS               | IMS               |
| 384     | Phenobarbital             | tablet        | 15mg      | Prevalence        | KZN*              | IMS               | IMS               |
| 385     | Phenobarbital             | tablet        | 30mg      | Prevalence        | KZN               | IMS               | IMS               |
| 386     | Phenobarbital/vit B Co    | syrup         | 16mg/5mL  | Prevalence*       | KZN*              | IMS               | IMS               |
| 257     | Phenoxymethylpenicillin   | tablet        | 500mg     | KZN*              | KZN*              | IMS               | IMS               |
| 258     | Phenoxymethylpenicillin   | suspension    | 125mg/5mL | KZN               | KZN               | IMS               | IMS               |
| 259     | Phenoxymethylpenicillin   | suspension    | 250mg/5mL | KZN*              | KZN*              | IMS               | IMS               |
| 260     | Phenoxymethylpenicillin   | tablet        | 250mg     | KZN               | KZN               | IMS               | IMS               |

| Item ID | Compound             | Formulation     | Strength  | Scenario 1 source | Scenario 2 source | Scenario 3 source | Scenario 4 source |
|---------|----------------------|-----------------|-----------|-------------------|-------------------|-------------------|-------------------|
| 387     | Phenytoin            | capsules        | 100mg     | Prevalence        | KZN               | IMS               | IMS               |
| 388     | Phenytoin            | oral suspension | 125mg/5mL | Prevalence*       | KZN               | IMS               | IMS               |
| 389     | Phenytoin sodium     | injection       | 250mg/5mL | Prevalence*       | KZN               | IMS               | IMS               |
| 461     | Pilocarpine HCl      | eye drops       | 1%        | Prevalence        | Prevalence        | Prevalence        | Prevalence        |
| 135     | Potassium chloride   | tablet          | 600mg     | KZN               | KZN               | KZN               | KZN               |
| 208     | Povidone iodine      | cream           | 5%        | KZN               | KZN               | KZN               | KZN               |
| 209     | Povidone iodine      | cream           | 5%        | KZN               | KZN               | KZN               | KZN               |
| 210     | Povidone iodine      | ointment        | 10%       | KZN               | KZN               | KZN               | KZN               |
| 211     | Povidone iodine      | solution        | 0.75%     | KZN               | KZN               | KZN               | KZN               |
| 212     | Povidone iodine      | solution        | 10mg/mL   | KZN*              | KZN*              | KZN*              | KZN*              |
| 433     | Praziquantel         | tablet          | 600mg     | Forecast*         | Forecast*         | Forecast*         | Forecast*         |
| 237     | Prednisolone forte   | tablet          | 50mg      | Denmark           | KZN*              | Denmark           | KZN*              |
| 238     | Prednisone           | tablet          | 5mg       | Denmark           | KZN               | Denmark           | KZN               |
| 429     | Primaquine phosphate | tablet          | 15mg      | Forecast          | Forecast          | Forecast          | Forecast          |
| 230     | Progesterone         | injection       | 50mg/ml   | Denmark           | KZN*              | Denmark           | KZN*              |
| 458     | Promethazine         | tablet          | 10mg      | Denmark*          | KZN               | Denmark*          | KZN               |
| 459     | Promethazine         | tablet          | 25mg      | Denmark           | KZN               | Denmark           | KZN               |
| 174     | Propranolol          | tablet          | 10mg      | Denmark           | KZN               | IMS               | IMS               |
| 175     | Propranolol          | tablet          | 20mg      | Denmark*          | KZN*              | IMS               | IMS               |
| 176     | Propranolol          | tablet          | 40mg      | Denmark           | KZN               | IMS               | IMS               |
| 316     | Pyrazinamide         | tablet          | 500mg     | Forecast          | Forecast          | Forecast          | Forecast          |
| 430     | Quinine              | ampoule         | 300mg/ml  | Forecast          | Forecast          | Forecast          | Forecast          |
| 431     | Quinine              | tablet          | 300mg     | Forecast*         | Forecast*         | Forecast*         | Forecast*         |
| 106     | Ranitidine           | tablet          | 150mg     | Prevalence        | KZN               | Prevalence        | KZN               |
| 107     | Ranitidine HCl       | ampule          | 25mg/ml   | Prevalence        | KZN               | Prevalence        | KZN               |
| 309     | Rifampicin           | capsules        | 150mg     | Forecast          | Forecast          | Forecast          | Forecast          |
| 310     | Rifampicin           | capsules        | 600mg     | Forecast          | Forecast          | Forecast          | Forecast          |

| Item ID | Compound                                     | Formulation             | Strength         | Scenario 1 source | Scenario 2 source | Scenario 3 source | Scenario 4 source |
|---------|----------------------------------------------|-------------------------|------------------|-------------------|-------------------|-------------------|-------------------|
| 318     | Rifampicin/isoniazid                         | tablet                  | 150/75mg         | Forecast*         | Forecast*         | Forecast*         | Forecast*         |
| 319     | Rifampicin/isoniazid                         | tablet                  | 300/150mg        | Forecast          | Forecast          | Forecast          | Forecast          |
| 320     | Rifampicin/isoniazid                         | tablet                  | 60/60mg          | Forecast          | Forecast          | Forecast          | Forecast          |
| 321     | Rifampicin/isoniazid/pyrizinamide/ethambutol | tablet                  | 150/75/400/275mg | Forecast*         | Forecast*         | Forecast*         | Forecast*         |
| 311     | Rifampin (Rifampicin)                        | capsule                 | 300mg            | Forecast*         | Forecast*         | Forecast*         | Forecast*         |
| 410     | Risperidone                                  | tablet                  | 0.5mg            | Prevalence        | KZN               | Prevalence        | KZN               |
| 411     | Risperidone                                  | tablet                  | 1mg              | Prevalence        | KZN               | Prevalence        | KZN               |
| 330     | Ritonavir                                    | capsules                | 100mg            | Forecast          | Forecast          | Forecast          | Forecast          |
| 331     | Ritonavir                                    | oral solution           | 80mg/mL          | Forecast*         | Forecast*         | Forecast*         | Forecast*         |
| 443     | Salbutamol                                   | inhaler                 | 100mcg/dose      | Prevalence        | KZN               | Prevalence        | KZN               |
| 444     | Salbutamol                                   | inhaler                 | 100mcg/dose      | Prevalence*       | KZN*              | Prevalence*       | KZN*              |
| 445     | Salbutamol                                   | solution for inhalation | 0.50%            | Prevalence        | KZN               | Prevalence        | KZN               |
| 455     | Salbutamol                                   | ampoule                 | 1mg/mL           | Prevalence        | KZN               | Prevalence        | KZN               |
| 456     | Salbutamol sulfate                           | syrup                   | 2mg/5ml          | Prevalence        | KZN               | Prevalence        | KZN               |
| 202     | Silver Sulfadiazine                          | topical cream           | 10mg/g           | Denmark           | KZN               | Denmark           | KZN               |
| 190     | Simvastatin                                  | tablet                  | 10mg             | Denmark           | KZN               | IMS               | IMS               |
| 191     | Simvastatin                                  | tablet                  | 20mg             | Denmark           | KZN               | IMS               | IMS               |
| 152     | Sodium chloride                              | ampoule                 | 0.90%            | Denmark*          | KZN               | Denmark*          | KZN               |
| 153     | Sodium chloride                              | ampoule                 | 0.90%            | Denmark*          | KZN*              | Denmark*          | KZN*              |
| 154     | Sodium chloride                              | solution                | 0.90%            | Denmark*          | KZN*              | Denmark*          | KZN*              |
| 155     | Sodium chloride                              | solution                | 0.90%            | Denmark           | KZN               | Denmark           | KZN               |
| 156     | Sodium chloride                              | solution                | 0.90%            | Denmark*          | KZN               | Denmark*          | KZN               |
| 157     | Sodium chloride                              | solution                | 0.90%            | Denmark*          | KZN               | Denmark*          | KZN               |
| 394     | Sodium valproate                             | CR tablet               | 200mg            | Prevalence        | KZN               | IMS               | IMS               |
| 395     | Sodium valproate                             | tablet                  | 100mg            | Prevalence        | KZN*              | IMS               | IMS               |
| 396     | Sodium valproate                             | oral solution           | 200mg/5mL        | Prevalence        | KZN               | IMS               | IMS               |
| 397     | Sodium valproate SR                          | SR tablet               | 500mg            | Prevalence        | KZN               | IMS               | IMS               |



| Item ID | Compound                           | Formulation      | Strength              | Scenario 1 source | Scenario 2 source | Scenario 3 source | Scenario 4 source |
|---------|------------------------------------|------------------|-----------------------|-------------------|-------------------|-------------------|-------------------|
| 172     | Spironolactone                     | tablet           | 100mg                 | Denmark           | KZN               | Denmark           | KZN               |
| 173     | Spironolactone                     | tablet           | 25mg                  | Denmark           | KZN               | Denmark           | KZN               |
| 294     | Streptomycin sulfate               | injection        | 1g                    | Forecast*         | Forecast*         | Forecast*         | Forecast*         |
| 120     | Sulfasalazine                      | tablet           | 500mg                 | Denmark           | KZN               | Denmark           | KZN               |
| 468     | Tamoxifen                          | tablet           | 20mg                  | Prevalence        | Prevalence        | Prevalence        | Prevalence        |
| 342     | Tenofovir                          | tablet           | 300mg                 | Forecast*         | Forecast*         | Forecast*         | Forecast*         |
| 350     | Tenofovir/emtricitabine            | tablet           | 300/200mg             | Forecast*         | Forecast*         | Forecast*         | Forecast*         |
| 356     | Tetanus Immune Globulin            | injection        | 250IU                 | KZN               | KZN               | KZN               | KZN               |
| 369     | Tetracaine HCl                     | eye drops        | 0.50%                 | KZN               | KZN               | KZN               | KZN               |
| 198     | Tetracaine/arnica/salvia/aluminium | oral ointment    | 0.5/10%               | KZN               | KZN               | KZN               | KZN               |
| 200     | Tetracycline HCl                   | topical ointment | 3%                    | Denmark*          | Denmark*          | Denmark*          | Denmark*          |
| 244     | Tetracycline HCl                   | capsule          | 250mg                 | Denmark           | KZN*              | IMS               | IMS               |
| 142     | Tranexamic acid                    | ampule           | 100mg/mL              | Denmark           | KZN               | Denmark           | KZN               |
| 143     | Tranexamic acid                    | tablet           | 500mg                 | Denmark           | KZN               | Denmark           | KZN               |
| 303     | Vancomycin                         | vial             | 500mg/10ml            | KZN               | KZN               | IMS               | IMS               |
| 304     | Vancomycin                         | vial             | 1000mg                | KZN               | KZN               | IMS               | IMS               |
| 185     | Verapamil                          | tablet           | 40mg                  | Denmark           | KZN               | IMS               | IMS               |
| 138     | Warfarin                           | tablet           | 5mg                   | Denmark           | KZN               | Denmark           | KZN               |
| 103     | Water for injection                | ampoule          |                       | KZN               | KZN               | KZN               | KZN               |
| 104     | Water for injection                | ampoule          |                       | KZN               | KZN               | KZN               | KZN               |
| 105     | Water for injection                | ampoule          |                       | KZN               | KZN               | KZN               | KZN               |
| 333     | Zidovudine                         | syrup            | 50mg/5mL              | Forecast*         | Forecast*         | Forecast*         | Forecast*         |
| 334     | Zidovudine                         | tablet           | 100mg                 | Forecast*         | Forecast*         | Forecast*         | Forecast*         |
| 335     | Zidovudine                         | tablet           | 300mg                 | Forecast          | Forecast          | Forecast          | Forecast          |
| 474     | Zidovudine/Lamivudine              | Tablet           | 60 mg / 30 mg         | Forecast          | Forecast          | Forecast          | Forecast          |
| 475     | Zidovudine/Lamivudine/Nevirapine   | Tablet           | 60 mg / 30 mg / 50 mg | Forecast          | Forecast          | Forecast          | Forecast          |
| 136     | Zinc                               | syrup            | 10mg/5mL              | KZN               | KZN               | KZN               | KZN               |

| Item ID | Compound | Formulation | Strength | Scenario 1 source | Scenario 2 source | Scenario 3 source | Scenario 4 source |
|---------|----------|-------------|----------|-------------------|-------------------|-------------------|-------------------|
| 137     | Zinc     | tablet      | 20mg     | KZN               | KZN               | KZN               | KZN               |

\* indicates that this method of estimation resulted in zero consumption for this drug in the given scenario



## Appendix 1.2: Detailed methods for costing exercise

### 1. Creating the list of medicines

A critical question to address before starting this exercise was its scope. We sought to conform to the principle of essential medicines by including the most efficacious, safe and cost-effective treatments for priority disease conditions in low- and middle-income countries (LMICs). This analysis focused on medicines that can be administered in relatively low-resource health systems, without specialized care.

From the most recent core WHO Model List of Essential Medicines (WHO EML), we included all medicines categorized for use at the primary care level, and excluded those that are used only in tertiary care settings; secondary care medicines for priority or high-burden diseases in LMICs were included. Priority was defined based on current and estimated future public health relevance, and potential for safe and cost-effective treatment. The WHO core EML includes some products that were not modelled here due to data limitations, for example, some medicines for cancer, advanced cardiovascular care and hepatitis. For many of these conditions, global burden of disease data cannot be used to estimate demand for medicines as there is a complex progression through therapy options, based on an individual's pathology. Additionally, since some of the products are new, there are limited past-use data from LMICs. Furthermore the prices for some of these products are likely to change significantly in the future as the markets are nascent and evolving. In addition, a few additional primary care medicines were included based on national medicines lists from Iran and South Africa. We also removed all duplicates and standardized spellings (including across brand and generic names).

Using the WHO EML, we specified dosage forms and strength for these medicines (including multiple forms and strengths for some medicines). If the WHO EML did not include this information, we referred to procurement data from KwaZulu-Natal and, when still unclear, to the South African National Department of Health master procurement database. We omitted information on pack size, because various lists and formularies include different pack sizes; and a brief analysis revealed no consistent relationship between pack size and unit price (for the smallest dosing unit, e.g. tablet, capsule or ml in case of liquids). As a result, each unique medicine was included only with an associated dosage form and strength.

We matched each unique medicine on the list to an ATC (Anatomical Therapeutic Chemical) classification based on its active ingredient and indication, and a DDD (defined daily dose) based on the dosage form ([http://www.whocc.no/atc\\_ddd\\_index/](http://www.whocc.no/atc_ddd_index/)). For combination medicines, the DDD for each component was used and then summed during analysis. For medicines without a DDD, we defined a dosing unit based on the functional unit; for example, a 5 milligram suppository was assumed to have a dose of 5 milligrams per day. However, when data from IMS Health were incorporated in the analysis (see below), the IMS Standard Unit was used: the functional unit as described above for oral solids, suppositories and vials; for liquids, a quantity of 5 millilitres (thus a 100 millilitre bottle of suspension would include 20 doses of a medicine).

## 2. Estimating quantities

We applied an overall decision rule to estimate quantity required per medicine. First, for medicines with pre-existing demand scenario data (i.e., HIV, TB, malaria, and schistosomiasis), we used those numbers. Second, for medicines with a single indication, we used prevalence data to estimate the number of people requiring treatment in LMICs. Lastly, for all other medicines (i.e., those with multiple indications or for symptom relief), we used data on previous consumption.

### Demand data

External groups such as Clinton Health Access Initiative,<sup>1</sup> AIDS Medicines and Diagnostics Service,<sup>2</sup> UNITAID's ACT forecasting project,<sup>3</sup> the Reproductive Health Supplies Coalition,<sup>4</sup> and the Stop TB Partnership<sup>5</sup> create global demand forecasts for many of the products on our list (refs to be added). Such forecasts are typically constrained-need projections based on funding availability, disbursement timing and other scale-up constraints. In broad terms, these demand forecasts project the epidemiological need for a given disease in all LMICs, then estimate the number of people on treatment, and adjust for program target, case detection and other constraints that could not be overcome even with unlimited funding. This patient volume is translated into product demand (i.e., number of pills, tablets, capsules, vials) per country based on a standard treatment protocol; and these national-level estimates are aggregated to a global estimate.

These forecasts rely on several assumptions, which are detailed in Appendix 1.3. For example, all assume complete adherence to WHO or other normative guidelines on medicine use and duration. Clinically inferior products are therefore assumed to be discontinued if there is strong WHO recommendation against their use. This assumption would be violated in real-world situations of continued use of inferior products (e.g., stavudine for HIV/AIDS or chloroquine for malaria).<sup>6</sup> The global forecasts capture underlying need and translate it into a demand forecast based on funding availability, scale-up plans and other health system related constraints. The analysis presented here attempts to capture demand in an ideal scenario with low barriers to access to care and full funding. Whenever available, we therefore utilized the unconstrained scenarios of these forecasts; but in many cases, we readjusted the forecasts to reflect the unconstrained needs estimate required for the purposes of this study.

### Consumption data

There were three sources of data for calculating previous consumption, and these estimates were applied to different analysis scenarios (see Analysis Scenarios section).

- First, we used a combined dataset of all depot purchases and direct deliveries to public sector health facilities in KwaZulu-Natal province, South Africa, between 1 December 2014 and 30 November 2015. This dataset thus captures all public sector medicine purchases in this province for a 12-month period. The KwaZulu-Natal (KZN) data are reported as quantity procured per item (an item is defined as a medicine with a defined strength and dosage form). These were converted into milligrams (based on strength, pack size and quantity procured), and divided by the WHO DDD for this item (to calculate the DDD procured per year) and then by the midyear KZN population size (to calculate the DDD per person per year).
- Second, we used data from the Denmark Medstat database (<http://medstat.dk/en>), which includes data from the Register of Medicinal Product Statistics and the Danish State Serum Institute about all medicines sold to individuals (via pharmacies and non-pharmacy outlets), as well as to primary health facilities and hospitals. We used the most recent data available (2014). Most Denmark data were reported as DDD per 1000 people per day, so these were arithmetically scaled to the DDD per person per year; for those reported as packs, items, or quantity (litres or millilitres) per 1000 people per day, these were converted as appropriate to the unit in which price was available for this item.
- Lastly, IMS data were used from four LMICs: Hungary, South Africa, Thailand and Turkey. Data for 2014 were used. In these countries IMS collects data from ambulatory and hospital channels. Supplies to military hospitals and prisons are excluded except in Thailand where military hospitals are included in the sampling frame. Data are generally collected on a sample basis and projected based on geography and supply chain characteristics (for example type of specialty or size of a hospital). South Africa hospital and Turkish hospital data are not projected. South African hospital data reflects sales information from 5 of the 8 largest provinces, in Turkey coverage is estimated at 94% and 97% respectively. Information on the accuracy of the audits, and the methods used to validate the data can be found at <http://www.imshealth.com/en/acts>. IMS data are collected

as packs but the weight of each molecule within the pack is added as part of the referencing system. This information, together with the calculation of Standard Units, as described above, was used to calculate DDDs per person per year. Data from the 7 countries are used to calculate a median, and an upper and lower limit.

Consumption of a specific medicine in a given context may depend on treatment protocols, prescribing preferences, and available substitutes. So we identified all possible therapeutic substitutes for medicines with the same indication on our list based on the second or third level (therapeutic subgroup) WHO ATC and dosage form; additionally, where IMS data were used, comparison with the EphMRA list of medicines falling into the same ATC class. We made the assumption that, in a hypothetical clinical scenario wherein only the listed item was available, its consumption would be equal to the summed consumption of all these substitute medicines. Using this comprehensive substitution matrix, we identified the consumption of all substitutes, converted these to DDDs as described above, and added these together to estimate the total consumption for each medicine on our list in DDDs. We assumed that the reported data covered all drug procurement mechanisms for these populations, so could calculate population-based consumption directly from the reported data.

For items with multiple dosage forms and/or strengths on our list, we allocated total consumption across the forms and strengths based on the Denmark and KZN data. We estimated the proportion of consumption per dosage form, and then per strength, within each medicine – and split the DDD per person per year for that compound accordingly. In cases where Denmark data were used to calculate the DDD, these items had their proportional allocation also determined from the Denmark data; likewise, other medicines had KZN data used for both DDD calculation and proportional allocation.

The resulting DDD per person per year for each unique item on our list was then multiplied by the population in low- and middle-income countries to calculate how much consumption would occur in these countries (assuming the same underlying degree and pattern of consumption as in the underlying dataset(s)). This was then multiplied by the WHO DDD for this item to calculate the total milligrams consumed in low- and middle-income countries; and then divided by the milligrams per unit (e.g., tablet, or millilitres, etc.) for this item to obtain an estimated number of units needed in low- and middle-income countries per year.

### **Prevalence data**

The Global Burden of Disease (GBD) project supplied information on the number of people with each disease/condition in LMICs. For medicines on our list that did not have epidemiologic data from GBD, we conducted extensive literature reviews to identify a prevalence point estimate.

We then applied an estimate of treatment coverage to capture how many of these people would use the medicine. Because this costing model is a normative exercise – aiming to estimate the cost of providing essential medicines to all those who need them in low- and middle-income countries – these estimates were based on the level of treatment coverage attained in higher-income settings. (See Appendix 1.4 for a list of treatment coverage estimates used in this analysis.) This estimate of treatment coverage was used to scale the number of people with each disease/condition to the number who would use the relevant medicine.

For medicines with multiple dosage forms and/or strengths on our list, we applied the same process as described above for dividing across these: proportional allocation based on Denmark data, or where these would be misrepresentative, KZN data. For indications with multiple medicines on our list (e.g. GERD, diabetes, epilepsy), standard treatment guidelines identify the first, second and third line treatment options – but they do not provide information on splitting a patient population across these first, second and third line treatments. We therefore searched the literature for information on the percentage of patients with each utilization pattern (Appendix 1.4 includes this information).

We then multiplied the number of people who would use each unique medicine by the WHO DDD for this item, to calculate the number of milligrams needed per year per unique item. All medicines on our list require ongoing treatment, so we could assume a full year of constant treatment, with exceptions. First, iron deficiency anaemia has variable treatment duration but we maintained the 1-year assumption for simplicity. Second, there is an 8-week treatment duration for GERD<sup>7</sup>, so we assumed that each person using this medicine required exactly 56 days of the DDD. Third, antiviral medicines for herpes can be used as either suppressive or episodic treatment, with differing daily doses and durations; we assumed that 90% of patients would be on short episodic therapy and the rest would

use this suppressive therapy. The total milligrams per item were then divided by the strength of each item, to calculate the total number of units needed for each medicine on the list.

### 3. Estimating prices

Unit price data were obtained from the International Drug Price Indicator Guide (IDPIG). For each unique product, we used the supplier median price; if this was unavailable, we used the lowest buyer price from the IDPIG. If the IDPIG did not report a price for a given product, we calculated unit procurement price based first on KZN procurement data (2014) or else from Iran public sector procurement (2014). Average yearly exchanges reported by IRS were used to convert from National Currency Unit into US dollar 2014.

Prices for South Africa’s FTC were assumed for lowest prices for 3TC. (Even though RSA does not currently purchase 3TC, in case they did they are likely to negotiate to obtain prices closer to their current FTC prices.) For some of the medicines in this study (particularly ARVs), the single innovative manufacturer engages in tiered pricing. The prices used in this estimation are the lowest tier prices. Admittedly, some countries on our list are not eligible for the lowest tier prices. Similarly, the lowest prices we use are based on the assumption of generic availability. IP may prevent some countries from availing the generic prices.

### 4. Analysis scenarios

There were two main scenarios of interest for this analysis. In both scenarios, demand- and prevalence-based quantity estimates (as described above) were kept constant. The only thing that changed was the source of consumption data for those items using this method of quantity estimation:

1. What if consumption of medicines in low- and middle-income countries looked like Denmark?
2. What if consumption of medicines in low- and middle-income countries looked like KwaZulu-Natal?

In Scenario 1, data from Denmark were used to estimate consumption per item (both DDD for each medicine, and the proportional allocation of this across dosage forms and strengths) – except for medicines that would be rarely used in Denmark (e.g., antihelminthics) or would be used very differently in many low- and/or middle-income settings (e.g., antifungals for which usage would be higher in settings with higher HIV prevalence). For these medicines, consumption data from KZN were used in Scenario 1. In addition, we explored two alternate scenarios (3 and 4) where consumption data were replaced by data from IMS Health from four LMICs. (See Appendix 1.1 for a list of all the medicines and their data sources for scenarios 1, 2, 3 and 4.)

### 5. Sensitivity analyses

|                    |                                            |                                                                                                                                             |
|--------------------|--------------------------------------------|---------------------------------------------------------------------------------------------------------------------------------------------|
| Quantity estimates | Demand forecast data                       | Different scenarios as published from the base models                                                                                       |
|                    | Prevalence data                            | Confidence intervals around point estimates                                                                                                 |
|                    | Treatment coverage data                    | Set 50% as lower bound (no higher bound because the base case used a “best” scenario – i.e., treatment coverage from a high-income setting) |
| Price estimates    | Unit prices                                | Lowest and highest prices listed in IDPIG                                                                                                   |
|                    | Mark-ups (quality assurance, supply chain) | Upper limit: mark-ups for supply chain costs (12%), <sup>8</sup> and for quality assurance (1.7%) <sup>9</sup>                              |

### Appendix 1.2 – Reference List

- 1 Clinton Health Access Initiative (CHAI). The State of the Antiretroviral Drug Market in Low- and Middle-Income Countries, 2014-2019. New York, NY: CHAI, Issue 6, November 2015. Accessed 11 July 2016 at: [http://www.clintonhealthaccess.org/content/uploads/2015/11/CHAI-ARV-Market-Report-2015\\_FINAL.pdf](http://www.clintonhealthaccess.org/content/uploads/2015/11/CHAI-ARV-Market-Report-2015_FINAL.pdf)
- 2 Paediatric ARV Procurement Working Group. Consolidated Pediatric ARV Forecast of the Procurement. Presented at WHO/AMDS Meeting with Pharmaceutical Companies and Stakeholders Geneva, Switzerland, 20 March 2015. Accessed 15 June 2016 at: [www.who.int/hiv/amds/11\\_PAPWG-PC-Forecast.pdf](http://www.who.int/hiv/amds/11_PAPWG-PC-Forecast.pdf).
- 3 William Davidson Institute. ACT Forecast for malaria case management – Technical report. Ann Arbor, MI: William Davidson Institute, Nov 2015.
- 4 Reproductive Health Supplies Coalition. DMPA IM Demand Forecasting: Methodologies and Results, April 2016. Brussels, Belgium: WDI, Concept Foundation and RHSC, 2015. Accessed 15 June 2016 at:

[http://www.rhsupplies.org/uploads/tx\\_rhscpublications/DMPA\\_IM\\_Demand\\_Forecasting\\_-\\_Methodologies\\_and\\_Results.pdf](http://www.rhsupplies.org/uploads/tx_rhscpublications/DMPA_IM_Demand_Forecasting_-_Methodologies_and_Results.pdf).

5 Stop Tb. Roadmap for MDR-Tb Scale up; the Global Drug Facility (GDF). Increasing access to MDR-Tb drug through innovation and action. The Past, Present and Future of GDF's activities to meet increased scale up demand. Accessed 11 June 2016 at: [www.stoptb.org/assets/documents/gdf/whatis/gdf-prospectus.pdf](http://www.stoptb.org/assets/documents/gdf/whatis/gdf-prospectus.pdf).

6 World Health Organization. New HIV recommendations to improve health, reduce infections and save lives [news release]. Geneva: WHO, 30 November 2009.

7 Katz PO, Gerson LB, Vela MF. Diagnosis and management of gastroesophageal reflux disease. *Am J Gastroenterol*, 108: p. 308-328, 2013.

8 Sarley, D, Allain L, Akkihal A. Estimating the Global In-Country Supply Chain Costs of Meeting the MDGs by 2015. Arlington: USAID | DELIVER PROJECT, 2009.

9 Shretta R, Johnson B, Smith L, et al. Costing the supply chain for delivery of ACT and RDTs in the public sector in Benin and Kenya. *Malar J*. 2015;14:57.



## Appendix 1.3: Assumptions

We made a number of assumptions for this modeling exercise:

- First, a major assumption (in using KZN and Denmark consumption data along with the substitution matrix) is that clinicians and patients consistently follow treatment guidelines; and those who do not would randomly distribute across possible medicines (within a therapeutic group), or dosage forms, or strengths. This assumption would be violated and would impact the results of this model if, in real clinical settings, clinicians are non-randomly inclined towards substitutes, and in particular those with particularly high or low prices – but we had no reason to believe this might be the case, so made this assumption so the model could be fully specified.
- Second, even when using prevalence data to estimate the number of individuals in need for treatment, it is unknown how many individuals require a first, second or subsequent treatment line. We assumed that split between different lines of treatment are similar across populations. Because this model was taking a normative costing approach, and assuming very low barriers to access to medicines and services, we felt more confident in making this assumption. We also conducted literature reviews to support our assumptions about treatment coverage and how patients divide across treatment lines, and we primarily incorporated data from higher-income settings where such barriers would likely be lowered.
- Third, there are many assumptions embedded in the demand forecasts used here – for example, whether constraints in diagnosis may in fact lead to under-estimates of the number of people with each disease; and that certain historic behaviors (such as countries' preferences for procurement of different triple fixed-dose combinations) would continue into the future.

Additionally, there were assumptions incorporated within the ARV demand forecasts:

- The total number of people on treatment was assumed to be 28.7 million adults and 2.3 million children. This is based on country targets and does not reflect funding commitment/availability, diagnostic and other scale up barriers that may be encountered. It is still lower than the 90-90-90 targets.
- Most adults on first line treatment were assumed to be on one of the two triple FDCs: TDF+3TC+EFV, TDF+FTC+EFV.
- Historical procurement split in LMICS between these two triple FDCs was used to project split between them.
- Global ARV forecasts made based on country projections as captured in WHO/CHAI/Avenir Health document were used to estimate the splits for second line treatment.
- In conformity with WHO recommendations it was assumed that there would be no use of d4T in the future.
- It was assumed that there would be no use of TDF individually and it will only be used in the FDC forms.
- Single 3TC use was restricted to the 150 mg strength only primarily for patients unable to take FDC and who need dose adjustments for renal impairment etc. 3TC 300 mg strength was assumed to have zero demand.

Another set of assumptions was used for the malaria medicine forecasts:

- Projections for number of Pf and Pv cases in 2016 were used from a forecast developed by the William Davidson Institute. These are based on a combination of historical WMR case estimates and API based projections.
- Treatment policy for uncomplicated Pf, Pv and severe malaria in each country was used from the World Malaria Report 2014. Full adherence to the treatment policy was assumed to estimate demand for SP, Primaquine, Quinine and CQ.
- ACT demand forecast was taken directly from the forecast developed by the William Davidson Institute. The ACT demand forecast included three demand scenarios: Low ACT demand, Moderate demand and high demand. These scenarios already included assumptions about greater use of RDTs.
- The total ACT demand was split into doses/strength based on past breakdown of doses/strength.
- Our essential list only had one ACT formulation so there was no need to split total ACT demand into demand for individual formulations.
- Going with the assumption of normative estimates and adherence to treatment guidelines, the demand for oral quinine and chloroquine liquid suspension was assumed to be zero.

The TB medicine forecasts also included assumptions:

- All patients detected with pulmonary TB were assumed to be put on treatment.
- 95% of patients on first line treatment were assumed to be on standard patient kits.
- Full adherence to treatment guidelines was assumed.
- For MDR-TB, the split between demand for Group 2 medicines was based on historical split between these medicines from GDF & Global Fund procurement data.
- The only feasible regimens based on the medicines included in our list were the following:
  - 8 Amikacin/Ofx/Ethionamide/Ethambutol 12 Ofx/Ethionamide/Ethambutol
  - 8 Capreomycin/Ofx/Ethionamide/Pyrazinamide 12 Ofx/Ethionamide/Pyrazinamide
  - 8 Amikacin/Ofx/Ethionamide/Pyrazinamide 12 Ofx/Ethionamide/Pyrazinamide
  - 8 Capreomycin/Ofx/Ethionamide/Ethambutol 12 Ofx/Ethionamide/Ethambutol

#### Appendix 1.4: Treatment coverage assumptions

**Table A1.4.1: Percentage of patients with each condition estimated to be on treatment, in high-income countries (“treatment coverage”)**

| Indication                    | Treatment coverage              |
|-------------------------------|---------------------------------|
| Antidepressant                | 29% (1)                         |
| Asthma                        | 51% (1)                         |
| Bipolar disorder              | 29% (1)                         |
| Bronchospasm from COPD        | 83% (2)                         |
| Diabetes                      | 94% (1)                         |
| Epilepsy                      | 90% (3)                         |
| GERD                          | 60% (1)                         |
| Gout                          | 50%*                            |
| Herpes, varicella             | 50%*                            |
| Hypothyroidism                | 70%*                            |
| Iron supplement               | 100%                            |
| Obsessive Compulsive Disorder | 30% [approximate, based on (1)] |
| Parkinson's                   | 50%*                            |
| Schizophrenia                 | 30% [approximate, based on (1)] |
| Breast cancer                 | 60%*                            |

\* indicates an estimated value, and/or expert opinion

**Table A1.4.2: Medicine coverage: percent of patients with a condition estimated on each listed drug**

| Compound and formulation        | Medicine coverage |
|---------------------------------|-------------------|
| Ranitidine tablets              | 20%               |
| Omeprazole capsules             | 80%               |
| Insulin                         | 15%               |
| Metformin tablets               | 72%               |
| Glibenclamide tablets           | 2%                |
| Gliclazide tablets              | 88%               |
| Ferrous sulfate tablets         | 100%              |
| Levothyroxine tablets           | 100%              |
| Clofazimine tablets             | 100%              |
| Dapsone tablets                 | 100%              |
| Aciclovir vial                  | 100%              |
| Allopurinol tablets             | 100%              |
| Phenobarbital tablets           | 12%               |
| Phenytoin sodium injection      | 26%               |
| Clonazepam tablets              | 5%                |
| Carbamazepine tablets           | 22%               |
| Sodium valproate tablets        | 49%               |
| Biperiden tablets               | 8%                |
| Levodopa/carbidopa 10 tablets   | 60%               |
| Chlorpromazine tablets          | 6%                |
| Fluphenazine decanoate          | 5%                |
| Haloperidol tablets             | 12%               |
| Clozapine tablets               | 4%                |
| Lithium carbonate tablets       | 29%               |
| Risperidone tablets             | 69%               |
| Amitriptyline 25 mg 28 tablets  | 19%               |
| Fluoxetine capsules             | 74%               |
| Salbutamol inhaler              | 100%              |
| Beclomethasone inhaler          | 2%                |
| Budesonide inhaler              | 58%               |
| Ipratropium inhaler             | 100%              |
| Ipratropium inhalation solution | 100%              |
| Salbutamol ampoule              | 2%                |
| Salbutamol solution             | 10%               |
| Acetylcholine eye drops         | 17%               |
| Tamoxifen tablets               | 100%              |

*Data sources for values in Table A3-2: Diabetes (4); Psychiatric and mental health medicines (5-15); COPD (2, 16); GERD (17-19); Epilepsy (20-22); Parkinson (23); Asthma (24); Hypothyroidism (25)*

## Appendix 1.4 – Reference List

- 1 Ormel J, Petukhova M, Chatterji S, Aguilar-Gaxiola S, Alonso J, Angermeyer MC, et al. Disability and treatment of specific mental and physical disorders across the world. *The British Journal of Psychiatry*. 2008;192(5):368-75.
- 2 Price D, West D, Brusselle G, Gruffydd-Jones K, Jones R, Miravittles M, et al. Management of COPD in the UK primary-care setting: an analysis of real-life prescribing patterns. *International journal of chronic obstructive pulmonary disease*. 2014.
- 3 Meyer A-C, Dua T, Ma J, Saxena S, Birbeck G. Global disparities in the epilepsy treatment gap: a systematic review. *Bulletin of the World Health Organization*. 2010;88(4):260-6.
- 4 Strøm H, Selmer R, Birkeland KI, Schirmer H, Berg TJ, Jenum AK, et al. No increase in new users of blood glucose-lowering drugs in Norway 2006–2011: a nationwide prescription database study. *BMC public health*. 2014;14(1):1.
- 5 Bret MC, Bret P, Pariente A, Fourier-Reglat A. The use of atypical antipsychotics in French psychiatric hospitals. *Pharmacy World & Science*. 2007;29(5):551-6.
- 6 Roh D, Chang J-G, Kim C-H, Cho H-S, An SK, Jung Y-C. Antipsychotic polypharmacy and high-dose prescription in schizophrenia: a 5-year comparison. *Australian and New Zealand Journal of Psychiatry*. 2014;48(1):52-60.
- 7 Gaviria AM, Franco JG, Aguado V, et al. A Non-Interventional Naturalistic Study of the Prescription Patterns of Antipsychotics in Patients with Schizophrenia from the Spanish Province of Tarragona. *PLoS one*. 2015;10(10):e0139403.
- 8 Grover S, Avasth A, Kalita K, Dalal P, Rao G, Chadda R, et al. IPS multicentric study: Antidepressant prescription patterns. *Indian journal of psychiatry*. 2013;55(1):41.
- 9 Kim H-Y, Lee H-W, Jung S-H, Kang M-H, Bae J-N, Lee J-S, et al. Prescription patterns for patients with schizophrenia in Korea: a focus on antipsychotic polypharmacy. *Clinical Psychopharmacology and Neuroscience*. 2014;12(2):128.
- 10 Kroken RA, Johnsen E, Ruud T, Wentzel-Larsen T, Jørgensen HA. Treatment of schizophrenia with antipsychotics in Norwegian emergency wards, a cross-sectional national study. *Bmc Psychiatry*. 2009;9(1):1.
- 11 Hengartner MP, Angst F, Ajdacic-Gross V, Rössler W, Angst J. Treated versus non-treated subjects with depression from a 30-year cohort study: prevalence and clinical covariates. *European archives of psychiatry and clinical neuroscience*. 2015:1-8.
- 12 Kessler RC, Chiu WT, Demler O, Walters EE. Prevalence, severity, and comorbidity of 12-month DSM-IV disorders in the National Comorbidity Survey Replication. *Archives of general psychiatry*. 2005;62(6):617-27.
- 13 Song HR, Kwon YJ, Bahk WM, Woo YS, Lee HB, Lee J, et al. Current prescription pattern of maintenance treatments for bipolar patients in Korea: A focus on the transition from acute treatments. *Psychiatry and Clinical Neurosciences*. 2016;70(1):42-50.
- 14 Thakkar KB, Jain MM, Billa G, Joshi A, Khobragade AA. A drug utilization study of psychotropic drugs prescribed in the psychiatry outpatient department of a tertiary care hospital. *J Clin Diagn Res*. 2013;7(12):2759-64.
- 15 Vares M, Saetre P, Strålin P, Levander S, Lindström E, Jönsson EG. Concomitant medication of psychoses in a lifetime perspective. *Human Psychopharmacology: Clinical and Experimental*. 2011;26(4-5):322-31.

- 16 Asche CV, Leader S, Plauschinat C, et al. Adherence to current guidelines for chronic obstructive pulmonary disease (COPD) among patients treated with combination of long-acting bronchodilators or inhaled corticosteroids. *Int J Chron Obstruct Pulmon Dis*. 2012;7:201-9.
- 17 Moore M, Afaneh C, Benhuri D, Antonacci C, Abelson J, Zarnegar R. Gastroesophageal reflux disease: A review of surgical decision making. *World*. 2016;8(1):77-83.
- 18 El-Serag HB, Sweet S, Winchester CC, Dent J. Update on the epidemiology of gastro-oesophageal reflux disease: a systematic review. *Gut*. 2013;gutjnl-2012-304269.
- 19 Lee KJ, Kim JI, Park JS, et al. Practice pattern of gastroenterologists for the management of GERD under the minimal influence of the insurance reimbursement guideline: a multicenter prospective observational study. *Journal of Korean medical science*. 2011;26(12):1613-8.
- 20 Lee S-Y, Jung K-Y, Lee IK, et al. Prevalence of treated epilepsy in Korea based on national health insurance data. *Journal of Korean medical science*. 2012;27(3):285-90.
- 21 Nicholas JM, Ridsdale L, Richardson MP, Ashworth M, Gulliford MC. Trends in antiepileptic drug utilisation in UK primary care 1993–2008: cohort study using the General Practice Research Database. *Seizure*. 2012;21(6):466-70.
- 22 Purcell B, Gaitatzis A, Sander J, Majeed A. Epilepsy prevalence and prescribing patterns in England and Wales. *Health Statistics Quarterly*. 2002;15(Autumn):23-30.
- 23 Nakaoka S, Ishizaki T, Urushihara H, et al. Prescribing pattern of anti-Parkinson drugs in Japan: a trend analysis from 2005 to 2010. *PLoS one*. 2014;9(6):e99021.
- 24 Reddel HK, Sawyer SM, Everett PW, Flood PV, Peters MJ. Asthma control in Australia: a cross-sectional web-based survey in a nationally representative population. *Medical journal of Australia*. 2015;202(9):492-6.
- 25 Raza SA, Mahmood N. Subclinical hypothyroidism: controversies to consensus. *Indian journal of endocrinology and metabolism*. 2013;17(9):636.

## Appendix 1.5

**Table: Total pharmaceutical expenditure as percentage of Gross Domestic Product (GDP), 2010**

| Countries<br>Income group | N   | Population<br>(thousands) | Total pharmaceutical expenditure (% of GDP) |            |         |         | Public pharmaceutical expenditure (% of GDP) | Total health expenditure (% of GDP) |          |
|---------------------------|-----|---------------------------|---------------------------------------------|------------|---------|---------|----------------------------------------------|-------------------------------------|----------|
|                           |     |                           | Mean (%)                                    | Median (%) | Min (%) | Max (%) | Mean (%)                                     | N                                   | Mean (%) |
| High                      | 49  | 1,091,925                 | 1.4%                                        | 1.4%       | 0.2%    | 2.9%    | 0.8%                                         | 49                                  | 8.1%     |
| Upper middle              | 53  | 2,457,274                 | 1.4%                                        | 1.3%       | 0.3%    | 3.2%    | 0.6%                                         | 32                                  | 6.8%     |
| Lower middle              | 48  | 2,428,619                 | 1.6%                                        | 1.3%       | 0.2%    | 5.2%    | 0.5%                                         | 48                                  | 6.6%     |
| Low                       | 32  | 748,953                   | 1.6%                                        | 1.5%       | 0.4%    | 3.6%    | 0.4%                                         | 53                                  | 6.9%     |
| All countries             | 182 | 6,726,772                 | 1.5%                                        | 1.4%       | 0.2%    | 5.2%    | 0.6%                                         | 182                                 | 7.1%     |

*Source:* Authors' own analysis of WHO National Health Accounts (NHA) data files for 2010.

## Appendix 1.6

### Panel: The Lancet Commission on Essential Medicines Policies

The Lancet Commission on Essential Medicines Policies was established in July 2014. The Commission's charge was to:

- synthesise lessons learned from the 30 years of development and implementation of essential medicines policies, after Nairobi;
- develop an agenda for the next 20 years of national and global policies on essential medicines;
- raise global awareness of the importance of essential medicines policies to broader global health and sustainable development goals, especially universal health coverage; and,
- define key questions for further operational research that will contribute to increasing the effective and efficient implementation of essential medicines policies.

The 21 Commissioners, from 12 countries, were invited in their personal capacity on the basis of their technical expertise. Three in-person meetings were held to define the focus of the work of the Commission and develop the content of the report. Between meetings, commissioners worked on aspects of the report in smaller groups, sometimes with additional research support.

## Appendix 2.2: HITAP Assessment Process

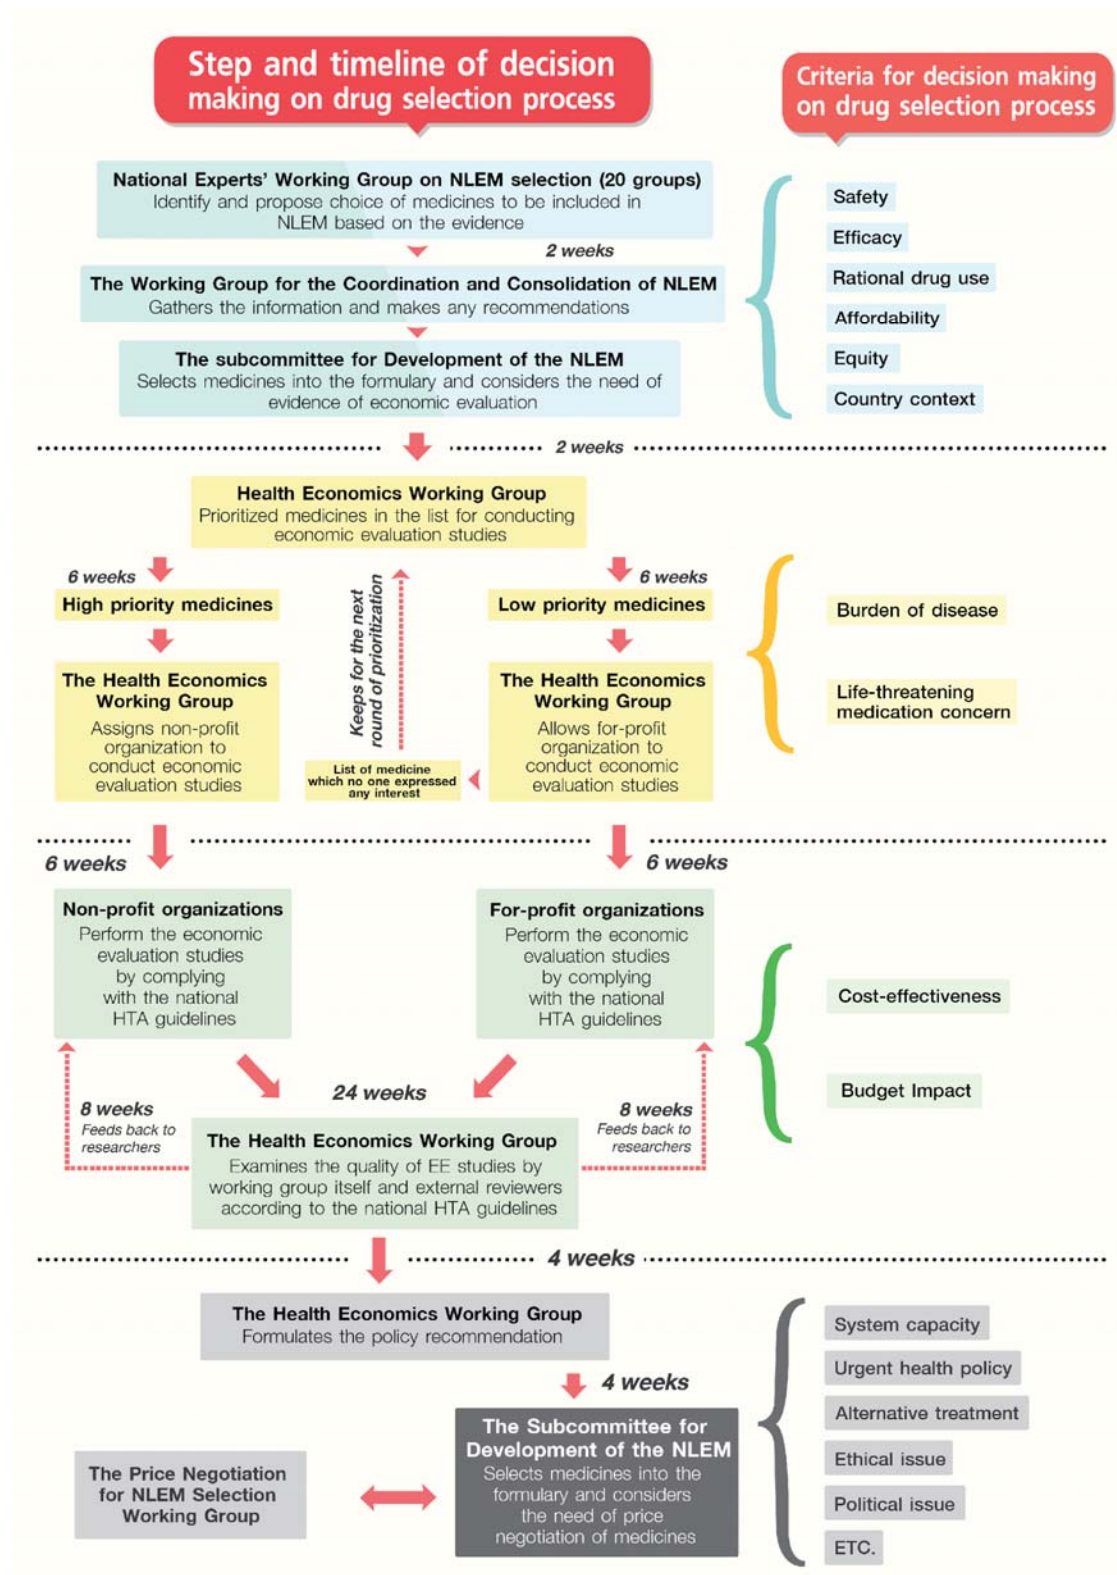



## Appendix 2.3

### Figure 5 - Definition

Data: from 20 high income and 7 middle income countries

Biological: The definition used to create the list of biological molecules is as follows: (a) Structure: Biologic molecules are complex macromolecules, typically with some form of polymer structure. (b) Identifiable: Any 'molecule' where the molecule name is descriptive and the actual composition of the molecule is not identified (e.g. Vegetable Extract) is not classified as a biologic. (c) Use: Biologic molecules must be, or are intended to be, clearly defined active therapeutic ingredients in a product. (d) Regulatory: Biologic molecules must have undergone (or be undergoing) a regulatory human clinical trial programme under the auspices of a national or regional regulatory authority (e) Licensing: Products containing biologic molecules must have been classified by IMS at one time as an Original, Licensed or Unassigned brand. Original and licensed brands are branded products that is manufactured and/or marketed by the Originator of the active ingredient or under license from the Originator. This step excludes biological molecules such as vitamins. (f) Protection: Molecules must be protected from generic competition or are unassigned. Protection can include: molecule product patents, delivery device patents, composition patents, process patents, Method of Use (MOU) patents, Supplementary Protection Certificates (SPCs), Certificats Complementaire de Protection (CCPs), marketing exclusivity, data exclusivity, orphan drug exclusivity, paediatric indication extension and known ongoing litigation. In the event that a molecule was found in conflicting categories (2 instances) these were further investigated and then assigned.

Non-biological: This includes all molecules that were not classified as biological as above.

Protected: Product was protected from generic competition. Calculated on a per month basis, and by country.

No longer protected: Product was protected from generic competition in this country but was not in this period. Calculated on a per month basis, and by country.

Never protected: Product was never protected from generic competition. Calculated on a per month basis, and by country.

### Appendix 3.1

**Figure: Examples of falsified artemisinin-combination products found in Africa**

The first product (left) is imitating a product containing artemether and lumefantrine, manufactured by IPCA, an Indian generic company. The second product (right) imitates Coartem, also claiming to contain artemether and lumefantrine, imitating a branded product produced by Novartis. Neither product contains any active pharmaceutical ingredient. In both cases the packaging is a close copy of the genuine product. These examples illustrate that both branded and generic products may be the target of falsification. When falsifications infringe on registered trademarks, they are also counterfeits.

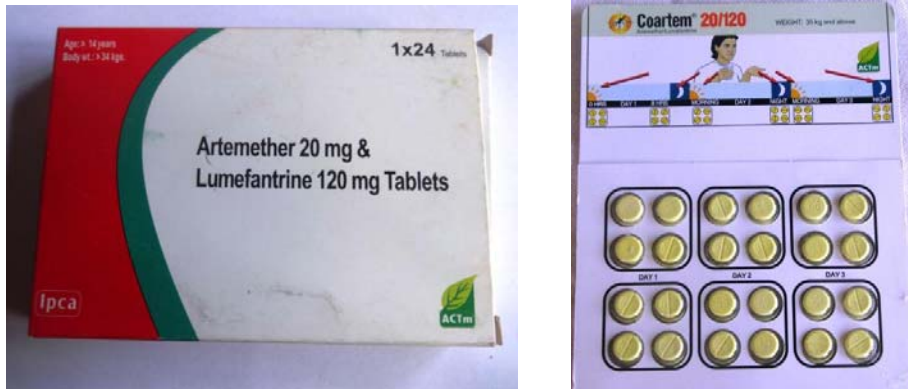

### Appendix 3.2

**Figure: Number of Low- and Middle-Income countries (LMIC) in the International Programme for International Drug Monitoring (1968-2015)**

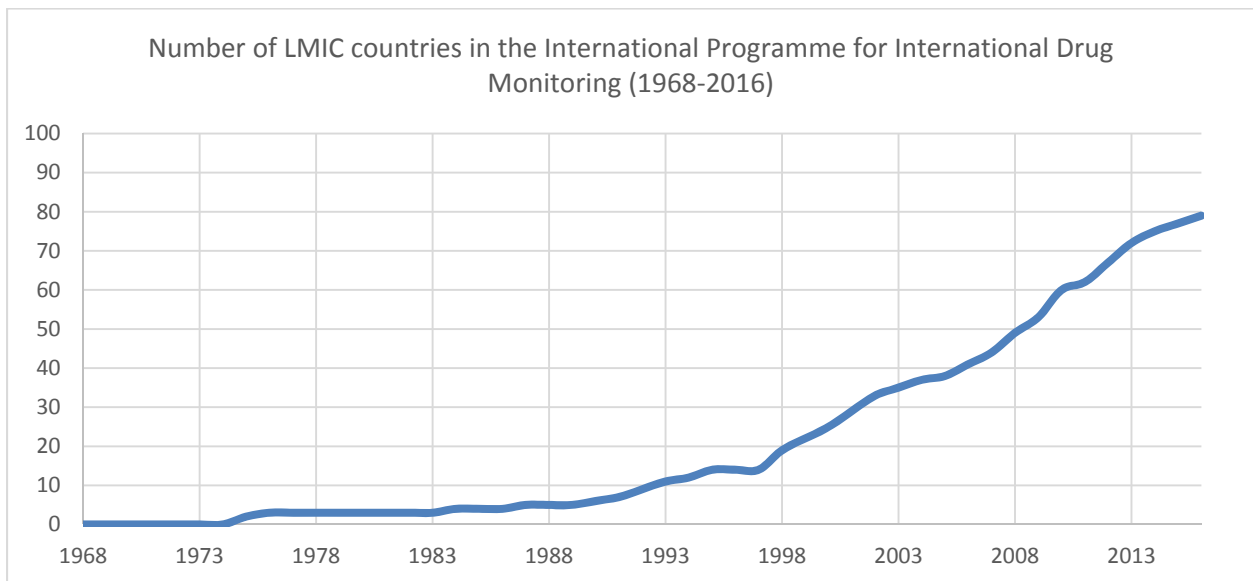

Data from World Health Organization. Accessed August 2016.

### Appendix 3.3

**Table: Essential Medicines Regulatory Functions**

| General regulatory functions for medicines                                                                                                                                                                                                                                                                                                                                                                                                                                                                                                                                                                                                       | Minimum regulatory functions                                                                                                                                                                                                                                                                                                                                                                                                                                                                                                                                                                                                                                                                                                               |
|--------------------------------------------------------------------------------------------------------------------------------------------------------------------------------------------------------------------------------------------------------------------------------------------------------------------------------------------------------------------------------------------------------------------------------------------------------------------------------------------------------------------------------------------------------------------------------------------------------------------------------------------------|--------------------------------------------------------------------------------------------------------------------------------------------------------------------------------------------------------------------------------------------------------------------------------------------------------------------------------------------------------------------------------------------------------------------------------------------------------------------------------------------------------------------------------------------------------------------------------------------------------------------------------------------------------------------------------------------------------------------------------------------|
| <ul style="list-style-type: none"><li>• License the manufacture, importation, exportation, distribution, promotion and advertising of medicines</li><li>• Issue marketing authorisations for products after thorough scientific assessment (medicines registration)</li><li>• Inspect manufacturers, importers, wholesalers and dispensers of medicines</li><li>• Control and monitor the quality and safety of medicines on the market; collect and analyse reports on adverse events</li><li>• Control promotion and advertising of medicines</li><li>• Provide independent information on medicines to professionals and the public</li></ul> | <ul style="list-style-type: none"><li>• Ensure that all premises and activities comply with Good Manufacturing Practice and other relevant standards</li><li>• Before medicines are marketed, assess their safety, efficacy and quality through a transparent process which may involve various degree of reliance on other regulator's decisions</li><li>• Control the manufacturing units and supply chain, including informal markets and e-commerce, to prevent illegal trade in medicines</li><li>• Prevent harmful, substandard and falsified medicines from penetrating the supply chain or reaching the public by other means</li><li>• Prevent misleading information from reaching the public and health professionals</li></ul> |

*Source: Adapted from WHO Effective medicines regulation: ensuring safety, efficacy and quality. WHO Policy Perspective on Medicines. Geneva: WHO. No. 7, 2003.*

### Appendix 3.4

#### **Panel: Fatal incident in Pakistan**

A 2012 incident in Lahore, Pakistan, killed 230 patients and caused serious adverse reactions in more than 850 others. Some batches of a common generic cardiovascular medicine, isosorbide mononitrate, were tested for the active ingredient before the incident and met quality specifications. However, forensic testing of the implicated batches after the event revealed that, in addition to the active ingredient on the label, the product also contained pyrimethamine (an antimalarial medicine) in substantial overdose. The effects of this substance were consistent with the symptoms exhibited by the patients. A key reason for the contamination was the manufacturer's negligent disregard of Good Manufacturing Practice principles. Decentralisation of the medicines regulatory authority in Pakistan to provincial authorities made effective regulation challenging.

## Appendix 4

**Table A4.1: Evidence from high quality systematic reviews about effectiveness of interventions targeting health professionals \***

| Type of intervention                                  | Description (Evidence Base)**                                                                                                                                                                                                                       | Selected results                                                                                                                                                                                                                                                                                                                                                                                                                                                                 | Summary                                |
|-------------------------------------------------------|-----------------------------------------------------------------------------------------------------------------------------------------------------------------------------------------------------------------------------------------------------|----------------------------------------------------------------------------------------------------------------------------------------------------------------------------------------------------------------------------------------------------------------------------------------------------------------------------------------------------------------------------------------------------------------------------------------------------------------------------------|----------------------------------------|
| Educational materials                                 | Distribution of published or printed recommendations for clinical care, including clinical practice guidelines, audio-visual materials and electronic publications, either personally or through mass mailings.<br>(16 quality reviews; 2 relevant) | Several previous reviews found educational materials alone to be ineffective <sup>1</sup><br>Current evidence suggests that educational materials may have small effects for improving drug choice <sup>2</sup>                                                                                                                                                                                                                                                                  | Possible small effect                  |
| Educational meetings                                  | Healthcare providers participate in conferences, lectures, workshops or traineeships.<br>(19 quality reviews; 4 relevant)                                                                                                                           | Educational meetings have mixed effects for improving appropriate care, <sup>3</sup> although one found them to be generally effective <sup>4</sup><br>Educational meetings had mixed effects on improving antibiotic prescribing, but interactive educational meetings appeared to be more effective than didactic lectures <sup>1</sup><br>Combined with audit and feedback, educational meetings may be effective for improving appropriate care and prescribing <sup>5</sup> | Mixed depending on style               |
| Educational outreach visits ("academic detailing")    | Trained person meets with providers in their practice settings to give information with the intent of changing the provider's practice; information may include feedback on performance<br>(8 quality reviews; 3 relevant)                          | Two reviews found educational outreach visits by physicians or pharmacists generally effective for improving appropriate care and prescribing <sup>6,7</sup><br>Results were mixed regarding the relative effectiveness of individual vs. group visits <sup>6</sup><br>One review indicated mixed effects for antibiotic prescribing <sup>1</sup>                                                                                                                                | Effective                              |
| Opinion leaders                                       | Use of providers nominated by colleagues as Influential sources of clinical advice to promote specific changes in practice.<br>(2 quality reviews; 1 relevant)                                                                                      | Use of local opinion leaders alone or combined with other interventions was generally effective for improving appropriate care outcomes <sup>8</sup>                                                                                                                                                                                                                                                                                                                             | Effective                              |
| Audit and feedback                                    | Summary of clinical performance over specified period which may include recommendations for clinical action; information may be from medical records, computerized databases, or observations from patients.<br>(11 quality reviews; 3 relevant)    | Audit and feedback generally effective used alone or combined with other interventions for improving appropriate care outcomes <sup>5,9</sup><br>Generally effective for improving prescribing outcomes <sup>5</sup><br>No effect on improving patient-centered clinical consultations when combined with educational training <sup>10</sup>                                                                                                                                     | Effective                              |
| Local consensus processes                             | Providers participate in discussion to ensure that they agree that the chosen clinical problem is important and the approach to managing the problem is appropriate.<br>(0 quality reviews)                                                         | No high quality reviews have examined this approach                                                                                                                                                                                                                                                                                                                                                                                                                              | No evidence                            |
| Reminders - computer decision support for drug dosing | Patient or encounter-specific information provided on a computer screen targeting medication dosage.<br>(9 quality reviews; 5 relevant)                                                                                                             | Generally effective for improving dosing in hospitals <sup>11,12</sup> but mixed or no effects in outpatient care <sup>13,14</sup><br>Uncertain effects for improving drug safety <sup>11,12,15</sup> and ineffective for improving other physician or patient outcomes <sup>11,12</sup>                                                                                                                                                                                         | Mixed depending on setting and outcome |
| Reminders - computerized order entry                  | Patient or encounter specific information, provided on a computer screen to automate the ordering of medication.<br>(3 quality reviews; 3 relevant)                                                                                                 | Mixed effects on improving appropriate care behavior <sup>13,16</sup><br>No evidence about effects on prescribing or other clinician behaviors <sup>13,15,16</sup>                                                                                                                                                                                                                                                                                                               | No evidence                            |
| Reminders – general                                   | Patient or encounter-specific information, provided verbally, on paper or by computer, to prompt a health professional to recall information.<br>(16 quality reviews; 2 relevant)                                                                   | Generally effective for improving appropriate care behavior and some evidence of effectiveness in improving prescribing <sup>17,18</sup>                                                                                                                                                                                                                                                                                                                                         | Generally effective                    |

| Type of intervention                                                                                                                                                                                                                                                                                                                                                              | Description (Evidence Base)**                                                                                                                                                                                                                              | Selected results                                                                                                                                                                                                                                                                                                        | Summary                           |
|-----------------------------------------------------------------------------------------------------------------------------------------------------------------------------------------------------------------------------------------------------------------------------------------------------------------------------------------------------------------------------------|------------------------------------------------------------------------------------------------------------------------------------------------------------------------------------------------------------------------------------------------------------|-------------------------------------------------------------------------------------------------------------------------------------------------------------------------------------------------------------------------------------------------------------------------------------------------------------------------|-----------------------------------|
| Financial incentives                                                                                                                                                                                                                                                                                                                                                              | Any change in reimbursement, incentive payment or penalty of healthcare professional, organization or patient.<br>(6 quality reviews; 5 relevant)                                                                                                          | Method of payment of primary care physicians appears to affect their behavior, but generalizability is unknown. <sup>19</sup><br>Provider drug budgets may be effective for improving appropriate use <sup>20</sup><br>Evidence about pay for performance is mixed and not convincing in many settings <sup>21-23</sup> | Limited evidence of mixed effects |
| Mass media                                                                                                                                                                                                                                                                                                                                                                        | Use of communication that reached great numbers of people including television, radio, newspapers, posters, leaflets, and booklets, alone or in conjunction with other interventions; targeted at the population level.<br>(2 quality reviews; 1 relevant) | Despite limited information about the interventions and poor quality research, it appears that mass media interventions may influence use of health care services <sup>24</sup><br><br>No direct evidence about use of medicines <sup>24</sup>                                                                          | No evidence                       |
| Patient-mediated interventions                                                                                                                                                                                                                                                                                                                                                    | Clinical information not previously available collected from patients and given to providers e.g. depression scores.<br>(5 quality reviews; 2 relevant)                                                                                                    | Overall evidence base is limited<br>Patient-mediated interventions appear to have mixed effects on improving appropriate care, <sup>1,25</sup> and little or no effect on improving antibiotic prescribing <sup>1</sup>                                                                                                 | Limited evidence of small effects |
| Tailored interventions                                                                                                                                                                                                                                                                                                                                                            | Strategies tailored to address specific, identified barriers to change in professional performance.<br>(2 quality reviews; 1 relevant)                                                                                                                     | Effective for improving appropriate care behavior and prescribing <sup>26</sup><br>No evidence about which aspects of tailoring improve effectiveness                                                                                                                                                                   | Effective                         |
| Multifaceted interventions                                                                                                                                                                                                                                                                                                                                                        | Any combination of two or more professional, organizational, financial, structural or regulatory interventions designed to improve prescribing practices or other health provider behavior.<br>(31 quality reviews; 8 relevant)                            | Most reviews have found multifaceted interventions to be generally effective to improve appropriate care and prescribing outcomes, <sup>5,6,27-29</sup> although some have reported mixed effects for antibiotic prescribing, <sup>1,9</sup> and for asthma and COPD care management <sup>30</sup>                      | Generally effective               |
| <p>* Evidence from Rx for Change database, <a href="http://www.cadth.ca/en/resources/rx-for-change">http://www.cadth.ca/en/resources/rx-for-change</a>, accessed January 22, 2016</p> <p>** Number of high quality or key systematic reviews identified; number of these reviews with enough studies to draw conclusions about the outcomes most relevant to use of medicines</p> |                                                                                                                                                                                                                                                            |                                                                                                                                                                                                                                                                                                                         |                                   |

**Table A4.2: Evidence from high quality systematic reviews about effectiveness of interventions to improve use of medicines by patients and consumers \***

| Type of intervention                           | Description (Evidence Base)                                                                                                                                                                                                                                                                                                                                        | Selected results                                                                                                                                                                                                                                                                                                                                                                                                                                                                                                                                                                                         | Summary                                           |
|------------------------------------------------|--------------------------------------------------------------------------------------------------------------------------------------------------------------------------------------------------------------------------------------------------------------------------------------------------------------------------------------------------------------------|----------------------------------------------------------------------------------------------------------------------------------------------------------------------------------------------------------------------------------------------------------------------------------------------------------------------------------------------------------------------------------------------------------------------------------------------------------------------------------------------------------------------------------------------------------------------------------------------------------|---------------------------------------------------|
| Providing information or education             | Strategies to provide information to consumers or promote health or treatment; can be provided to individuals or groups, in print or verbally, or face to face or remotely, simple or as part of a complex strategy (38 quality reviews; 14 relevant)                                                                                                              | Information or education as a single strategy has few effects on adherence, use, or outcomes <sup>31-39</sup><br>Information or education in conjunction with self-management skills training or counselling more consistently improved medication use <sup>32,39-44</sup>                                                                                                                                                                                                                                                                                                                               | Ineffective alone, but effective in combination   |
| Supporting behaviour change                    | Strategies focusing on adoption or promotion of health and treatment behaviours; may address underuse, overuse or misuse of medicines, and may include practical strategies to assist consumers in taking medicines correctly such as reminder devices, pre-packaging of multiple medicines, or simplified medicine formulations (45 quality reviews; 17 relevant) | Support, information, or education, alone or in multifaceted strategies, had inconsistent effects on adherence and outcomes across a range of conditions <sup>35-39,41-43,45,46</sup><br>Written or verbal information alone is only occasionally effective <sup>33,34</sup><br>Simplified dosing regimens improved adherence in half of studies, <sup>35,37,38</sup> while reminders had mixed effects <sup>35,38, 41</sup><br>Changing organization or delivery of care (e.g., pharmacist or nurse-led service delivery) had mixed effects on adherence and clinical outcomes <sup>7,37,39,47,48</sup> | Mixed depending on target behaviour and condition |
| Facilitating communication and decision making | Strategies to involve consumers in medicine decision making; to express their beliefs, values, or preferences about treatments and care; or to optimize communication with health professionals. (16 quality reviews; 2 relevant)                                                                                                                                  | Decisions aids improved knowledge and decision making, but few changes in treatment, adherence, or clinical outcomes <sup>49</sup><br>Delayed prescribing decreased antibiotic use, but had mixed effects on clinical outcomes and decreased satisfaction <sup>50</sup>                                                                                                                                                                                                                                                                                                                                  | Mixed depending on outcome                        |
| Improving care coordination or integration     | Strategies to improve the coordination or integration of care; can involve interventions that aim to overcome system barriers to medicines use, including access and financial barriers (18 quality reviews; 7 relevant)                                                                                                                                           | Less than half of strategies to improve care delivery and overcome system barriers improved adherence <sup>45</sup><br>Strategies to improve service quality or change the setting of care for specific conditions had mixed results <sup>36,38,39,51</sup><br>Reference pricing policies increased use of reference medicines, without affecting total use, <sup>52,53</sup> while patient cost sharing significantly decreased medicines expenditure and overall use <sup>53</sup>                                                                                                                     | Both effective and mixed                          |
| Interventions to prevent adverse events        | Strategies to prevent or manage adverse events of treatment or complications of disease; can be for ongoing treatment or related to emergency events, at an individual or at a population level (24 quality reviews; 7 relevant)                                                                                                                                   | Self-monitoring and self -management education decreased anticoagulation adverse events <sup>54</sup> but had mixed results for asthma <sup>36,55,56</sup> and epilepsy <sup>39</sup><br>Pharmacist-led medication quality reviews decreased adverse events <sup>57</sup> and pharmacy discharge planning reduced medication errors and improved adherence <sup>58</sup>                                                                                                                                                                                                                                 | Both effective and mixed                          |
| Building skills and competencies               | Strategies to assist consumers to develop a broad set of competencies around medicines use and health, such as medicines management or monitoring; or training consumers in the correct use of treatments or devices to deliver treatment (20 quality reviews; 9 relevant)                                                                                         | Self-monitoring and self-management skills for oral anticoagulation <sup>54</sup> and HAART <sup>42</sup> had positive effects on adherence and mixed effects on clinical outcomes<br>Action plans or self-management education for diabetes, <sup>37 40</sup> cystic fibrosis, <sup>43</sup> asthma, or COPD <sup>55,56,59,60</sup> had mixed effects                                                                                                                                                                                                                                                   | Both effective and mixed                          |
| Support in care management                     | Strategies to assist and encourage consumers to cope with and manage their health and related medicines use; can target patients or carers, as individuals or in groups, and can be delivered face to face or remotely (16 quality reviews; 2 relevant)                                                                                                            | Too little evidence to assess effectiveness of disease-specific counselling<br>Simple interventions more effective for short-term and complex interventions more effective for long-term treatment <sup>45</sup><br>Contracts with support (e.g., counselling reinforcement) did not consistently improve adherence or treatment continuation <sup>61</sup>                                                                                                                                                                                                                                              | Complex interventions more effective              |
| Involving consumers in system decision making  | Strategies to involve consumers in decision making on medicines use at a system level, such as in research planning, formulary and policy decisions; can involve different roles, such as planning, research, audit and quality reviews and governance (1 quality review; 1 relevant)                                                                              | Involving consumers in developing patient information material results in material that is more relevant, readable and understandable to patients <sup>62</sup>                                                                                                                                                                                                                                                                                                                                                                                                                                          | Limited information                               |

| Type of intervention                                                                                                                                                              | Description (Evidence Base) | Selected results | Summary |
|-----------------------------------------------------------------------------------------------------------------------------------------------------------------------------------|-----------------------------|------------------|---------|
| * Evidence from Rx for Change database, <a href="http://www.cadth.ca/en/resources/rx-for-change">http://www.cadth.ca/en/resources/rx-for-change</a> , accessed September 18, 2015 |                             |                  |         |

## Appendix 4 – Reference List

1. Arnold SR, Straus SE. Interventions to improve antibiotic prescribing practices in ambulatory care. *Cochrane Database Syst Rev* 2005;(4):CD003539.
2. Farmer AP, Légaré F, Turcot L, et al. Printed educational materials: effects on professional practice and health care outcomes. *Cochrane Database Syst Rev* 2008;(3):CD004398.
3. Lewin SA, Skea ZC, Entwistle V, Zwarenstein M, Dick J. Interventions for providers to promote a patient-centred approach in clinical consultations. *Cochrane Database Syst Rev* 2001;(4):CD003267.
4. Forsetlund L, Bjørndal A, Rashidian A, et al. Continuing education meetings and workshops: effects on professional practice and health care outcomes. *Cochrane Database Syst Rev* 2009;(2):CD003030.
5. Jamtvedt G, Young JM, Kristoffersen DT, O'Brien MA, Oxman AD. Audit and feedback: effects on professional practice and health care outcomes. *Cochrane Database Syst Rev* 2006;(2):CD000259.
6. O'Brien MA, Rogers S, Jamtvedt G, et al. Educational outreach visits: effects on professional practice and health care outcomes. *Cochrane Database Syst Rev Online* 2007;(4):CD000409.
7. Nkansah N, Mostovetsky O, Yu C, et al. Effect of outpatient pharmacists' non-dispensing roles on patient outcomes and prescribing patterns. *Cochrane Database Syst Rev* 2010;(7):CD000336.
8. Flodgren G, Parmelli E, Doumit G, et al. Local opinion leaders: effects on professional practice and health care outcomes. *Cochrane Database Syst Rev* 2011;(8):CD000125.
9. Davey P, Brown E, Fenelon L, et al. Interventions to improve antibiotic prescribing practices for hospital inpatients. *Cochrane Database Syst Rev* 2005;(4):CD003543.
10. Dwamena F, Holmes-Rovner M, Gaulden CM, et al. Interventions for providers to promote a patient-centred approach in clinical consultations. *Cochrane Database Syst Rev* 2012;12:CD003267.
11. Walton RT, Harvey E, Dovey S, Freemantle N. Computerised advice on drug dosage to improve prescribing practice. *Cochrane Database Syst Rev* 2001;(1):CD002894.
12. Tawadrous D, Shariff SZ, Haynes RB, Iansavichus AV, Jain AK, Garg AX. Use of clinical decision support systems for kidney-related drug prescribing: a systematic review. *Am J Kidney Dis Off J Natl Kidney Found* 2011;58(6):903–14.
13. Heselmans A, Van de Velde S, Donceel P, Aertgeerts B, Ramaekers D. Effectiveness of electronic guideline-based implementation systems in ambulatory care settings - a systematic review. *Implement Sci IS* 2009;4:82.
14. Garg AX, Adhikari NKJ, McDonald H, et al. Effects of computerized clinical decision support systems on practitioner performance and patient outcomes: a systematic review. *JAMA* 2005;293(10):1223–38.
15. Kaushal R, Shojania KG, Bates DW. Effects of computerized physician order entry and clinical decision support systems on medication safety: a systematic review. *Arch Intern Med* 2003;163(12):1409–16.
16. Main C, Moxham T, Wyatt JC, Kay J, Anderson R, Stein K. Computerised decision support systems in order communication for diagnostic, screening or monitoring test ordering: systematic reviews of the effects and cost-effectiveness of systems. *Health Technol Assess Winch Engl* 2010;14(48):1–227.
17. Arditi C, Rège-Walther M, Wyatt JC, Durieux P, Burnand B. Computer-generated reminders delivered on paper to healthcare professionals; effects on professional practice and health care outcomes. *Cochrane Database Syst Rev* 2012;12:CD001175.



18. Shojania KG, Jennings A, Mayhew A, Ramsay CR, Eccles MP, Grimshaw J. The effects of on-screen, point of care computer reminders on processes and outcomes of care. *Cochrane Database Syst Rev* 2009;(3):CD001096.
19. Gosden T, Forland F, Kristiansen IS, et al. Capitation, salary, fee-for-service and mixed systems of payment: effects on the behaviour of primary care physicians. *Cochrane Database Syst Rev* 2000;(3):CD002215.
20. Sturm H, Austvoll-Dahlgren A, Aaserud M, et al. Pharmaceutical policies: effects of financial incentives for prescribers. *Cochrane Database Syst Rev* 2007;(3):CD006731.
21. Eijkenaar F, Emmert M, Scheppach M, Schöffski O. Effects of pay for performance in health care: a systematic review of systematic reviews. *Health Policy Amst Neth* 2013;110(2-3):115–30.
22. Scott A, Sivey P, Ait Ouakrim D, et al. The effect of financial incentives on the quality of health care provided by primary care physicians. *Cochrane Database Syst Rev* 2011;(9):CD008451.
23. Witter S, Fretheim A, Kessy FL, Lindahl AK. Paying for performance to improve the delivery of health interventions in low- and middle-income countries. *Cochrane Database Syst Rev* 2012;2:CD007899.
24. Grilli R, Ramsay C, Minozzi S. Mass media interventions: effects on health services utilisation. *Cochrane Database Syst Rev* 2002;(1):CD000389.
25. Grimshaw JM, Thomas RE, MacLennan G, et al. Effectiveness and efficiency of guideline dissemination and implementation strategies. *Health Technol Assess Winch Engl* 2004;8(6):iii – iv, 1–72.
26. Baker R, Camosso-Stefinovic J, Gillies C, et al. Tailored interventions to overcome identified barriers to change: effects on professional practice and health care outcomes. *Cochrane Database Syst Rev* 2010;(3):CD005470.
27. Morgado MP, Morgado SR, Mendes LC, Pereira LJ, Castelo-Branco M. Pharmacist interventions to enhance blood pressure control and adherence to antihypertensive therapy: Review and meta-analysis. *Am J Health-Syst Pharm AJHP Off J Am Soc Health-Syst Pharm* 2011;68(3):241–53.
28. Baskerville NB, Liddy C, Hogg W. Systematic review and meta-analysis of practice facilitation within primary care settings. *Ann Fam Med* 2012;10(1):63–74.
29. Smith SM, Allwright S, O’Dowd T. Effectiveness of shared care across the interface between primary and specialty care in chronic disease management. *Cochrane Database Syst Rev* 2007;(3):CD004910.
30. Lemmens KMM, Nieboer AP, Huijsman R. A systematic review of integrated use of disease-management interventions in asthma and COPD. *Respir Med* 2009;103(5):670–91.
31. Gibson PG, Powell H, Coughlan J, et al. Limited (information only) patient education programs for adults with asthma. *Cochrane Database Syst Rev* 2002;(2):CD001005.
32. Li T, Wu HM, Wang F, et al. Education programmes for people with diabetic kidney disease. *Cochrane Database Syst Rev* 2011;(6):CD007374.
33. Nicolson D, Knapp P, Raynor DKT, Spoor P. Written information about individual medicines for consumers. *Cochrane Database Syst Rev* 2009;(2):CD002104.
34. Johnson A, Sandford J, Tyndall J. Written and verbal information versus verbal information only for patients being discharged from acute hospital settings to home. *Cochrane Database Syst Rev* 2003;(4):CD003716.
35. Schedlbauer A, Davies P, Fahey T. Interventions to improve adherence to lipid lowering medication. *Cochrane Database Syst Rev* 2010;(3):CD004371.

36. Tapp S, Lasserson TJ, Rowe B h. Education interventions for adults who attend the emergency room for acute asthma. *Cochrane Database Syst Rev* 2007;(3):CD003000.
37. Vermeire E, Wens J, Van Royen P, Biot Y, Hearnshaw H, Lindenmeyer A. Interventions for improving adherence to treatment recommendations in people with type 2 diabetes mellitus. *Cochrane Database Syst Rev* 2005;(2):CD003638.
38. Schroeder K, Fahey T, Ebrahim S. Interventions for improving adherence to treatment in patients with high blood pressure in ambulatory settings. *Cochrane Database Syst Rev* 2004;(2):CD004804.
39. Bradley PM, Lindsay B. Care delivery and self-management strategies for adults with epilepsy. *Cochrane Database Syst Rev* 2008;(1):CD006244.
40. Deakin T, McShane CE, Cade JE, Williams RDRR. Group based training for self-management strategies in people with type 2 diabetes mellitus. *Cochrane Database Syst Rev* 2005;(2):CD003417.
41. Gray TA, Orton LC, Henson D, Harper R, Waterman H. Interventions for improving adherence to ocular hypotensive therapy. *Cochrane Database Syst Rev* 2009;(2):CD006132.
42. Rueda S, Park-Wyllie LY, Bayoumi AM, et al. Patient support and education for promoting adherence to highly active antiretroviral therapy for HIV/AIDS. *Cochrane Database Syst Rev* 2006;(3):CD001442.
43. Savage E, Beirne PV, Ni Chroinin M, Duff A, Fitzgerald T, Farrell D. Self-management education for cystic fibrosis. *Cochrane Database Syst Rev* 2011;(7):CD007641.
44. Lindsay B, Bradley PM. Care delivery and self-management strategies for children with epilepsy. *Cochrane Database Syst Rev* 2010;(12):CD006245.
45. Haynes RB, Ackloo E, Sahota N, McDonald HP, Yao X. Interventions for enhancing medication adherence. *Cochrane Database Syst Rev* 2008;(2):CD000011.
46. Powell H, Gibson PG. Options for self-management education for adults with asthma. *Cochrane Database Syst Rev* 2003;(1):CD004107.
47. Machado M, Bajcar J, Guzzo GC, Einarson TR. Sensitivity of patient outcomes to pharmacist interventions. Part II: Systematic review and meta-analysis in hypertension management. *Ann Pharmacother* 2007;41(11):1770–81.
48. Machado M, Nassor N, Bajcar JM, Guzzo GC, Einarson TR. Sensitivity of patient outcomes to pharmacist interventions. Part III: systematic review and meta-analysis in hyperlipidemia management. *Ann Pharmacother* 2008;42(9):1195–207.
49. Stacey D, Bennett CL, Barry MJ, et al. Decision aids for people facing health treatment or screening decisions. *Cochrane Database Syst Rev* 2011;(10):CD001431.
50. Spurling GKP, Del Mar CB, Dooley L, Foxlee R. Delayed antibiotics for respiratory infections. *Cochrane Database Syst Rev* 2007;(3):CD004417.
51. Clar C, Waugh N, Thomas S. Routine hospital admission versus out-patient or home care in children at diagnosis of type 1 diabetes mellitus. *Cochrane Database Syst Rev* 2007;(2):CD004099.
52. Aaserud M, Dahlgren AT, Kösters JP, Oxman AD, Ramsay C, Sturm H. Pharmaceutical policies: effects of reference pricing, other pricing, and purchasing policies. *Cochrane Database Syst Rev* 2006;(2):CD005979.
53. Austvoll-Dahlgren A, Aaserud M, Vist G, et al. Pharmaceutical policies: effects of cap and co-payment on rational drug use. *Cochrane Database Syst Rev* 2008;(1):CD007017.

54. Garcia-Alamino JM, Ward AM, Alonso-Coello P, et al. Self-monitoring and self-management of oral anticoagulation. *Cochrane Database Syst Rev* 2010;(4):CD003839.
55. Bhogal S, Zemek R, Ducharme FM. Written action plans for asthma in children. *Cochrane Database Syst Rev* 2006;(3):CD005306.
56. Boyd M, Lasserson TJ, McKean MC, Gibson PG, Ducharme FM, Haby M. Interventions for educating children who are at risk of asthma-related emergency department attendance. *Cochrane Database Syst Rev* 2009;(2):CD001290.
57. Royal S, Smeaton L, Avery AJ, Hurwitz B, Sheikh A. Interventions in primary care to reduce medication related adverse events and hospital admissions: systematic review and meta-analysis. *Qual Saf Health Care* 2006;15(1):23–31.
58. Shepperd S, McClaran J, Phillips CO, et al. Discharge planning from hospital to home. *Cochrane Database Syst Rev* 2010;(1):CD000313.
59. Powell H, Gibson PG. Options for self-management education for adults with asthma. *Cochrane Database Syst Rev* 2003;(1):CD004107.
60. Turnock AC, Walters EH, Walters J a. E, Wood-Baker R. Action plans for chronic obstructive pulmonary disease. *Cochrane Database Syst Rev* 2005;(4):CD005074.
61. Bosch-Capblanch X, Abba K, Prictor M, Garner P. Contracts between patients and healthcare practitioners for improving patients' adherence to treatment, prevention and health promotion activities. *Cochrane Database Syst Rev* 2007;(2):CD004808.
62. Nilsen ES, Myrhaug HT, Johansen M, Oliver S, Oxman AD. Methods of consumer involvement in developing healthcare policy and research, clinical practice guidelines and patient information material. *Cochrane Database Syst Rev* 2006;(3):CD004563.

## Appendix 4.1

**Table: World Health Assembly resolutions related to medicines use**

| Resolution Number                                        | Year                                 | Topic                                                                                     |
|----------------------------------------------------------|--------------------------------------|-------------------------------------------------------------------------------------------|
| WHA39-27                                                 | 1986                                 | Revised drug strategy                                                                     |
| WHA41-16                                                 | 1998                                 | Rational drug use including counterfeit medicines and product quality                     |
| WHA43-20,<br>WHA45-27                                    | 1992<br>1996                         | Ethical criteria for drug promotion*                                                      |
| WHA47-13                                                 | 1994                                 | Role of the pharmacist in support of the WHO revised drug strategy                        |
| WHA51-9                                                  | 1998                                 | Cross-border advertising, promotion and sale of medical products using the Internet       |
| WHA57-14                                                 | 2004                                 | Scaling up treatment and care within a coordinated and comprehensive response to HIV/AIDS |
| WHA60-16                                                 | 2007                                 | Progress in the rational use of medicines                                                 |
| WHA67-22                                                 | 2014                                 | Access to essential medicines                                                             |
| WHA43-20<br>WHA45-27<br>WHA49-14<br>WHA52-19<br>WHA54-11 | 1992<br>1996<br>1996<br>1998<br>2001 | WHO programs and medicines strategies                                                     |

\*see Panel 2: Better Regulatory Control of Pharmaceutical Promotion is Necessary



---

## Appendix 4.2

**Table 4: Seven dimensions and elements in routine data**

| <b>Data dimension</b>                                                                      | <b>Routine data elements (examples)</b>                                                                                                                                                                                                                                                                 |
|--------------------------------------------------------------------------------------------|---------------------------------------------------------------------------------------------------------------------------------------------------------------------------------------------------------------------------------------------------------------------------------------------------------|
| Pharmaceutical<br><i>(provides information about the medicinal products themselves)</i>    | Molecule, therapeutic class, dosage form, strength, package size, manufacturer, distributor, product quality, product costs to payer (patient, insurer or government).                                                                                                                                  |
| Longitudinal<br><i>(provides information on use of product over time)</i>                  | Time of event (diagnosis, prescribing, dispensing, outcome/death), time between events, unique patient identifier                                                                                                                                                                                       |
| Geographic<br><i>(provides information on location of use of product)</i>                  | National, regional, local, facility                                                                                                                                                                                                                                                                     |
| Organizational<br><i>(provides information on setting for use of product)</i>              | Facility type (public or private, formal or informal, primary care or specialty), provider type and characteristics                                                                                                                                                                                     |
| Socio-demographic<br><i>(provides information on characteristics of patients treated)</i>  | Patient age, gender, religion, caste, deprivation                                                                                                                                                                                                                                                       |
| Clinical<br><i>(provides information on health status of patients and health outcomes)</i> | Diagnosis, diagnostic tests, organ function, concomitant diseases                                                                                                                                                                                                                                       |
| Financial<br><i>(provides information on costs associated with use of product)</i>         | Cost associated with using a product (e.g., costs of tests to identify appropriate patients, administration fees, cold chain distribution) and with monitoring its use (e.g., safety monitoring, medicines utilisation reviews); cost of care (increases and offsets) associated with use of a product. |

### Appendix 4.3

#### Instagram post by Kim Kardashian promoting a morning sickness medication

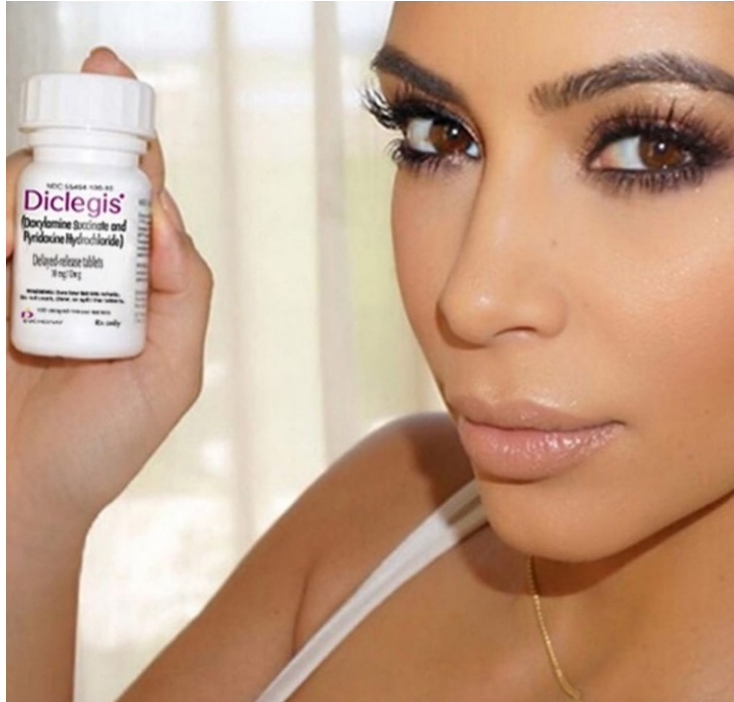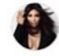

kimkardashian

FOLLOWING

464k likes

1w

kimkardashian OMG. Have you heard about this? As you guys know my #morningsickness has been pretty bad. I tried changing things about my lifestyle, like my diet, but nothing helped, so I talked to my doctor. He prescribed me #Diclegis, I felt a lot better and most importantly, it's been studied and there was no increased risk to the baby. I'm so excited and happy with my results that I'm partnering with Duchesnay USA to raise awareness about treating morning sickness. If you have morning sickness, be safe and sure to ask your doctor about the pill with the pregnant woman on it and find out more [www.diclegis.com](http://www.diclegis.com); [www.DiclegisImportantSafetyInfo.com](http://www.DiclegisImportantSafetyInfo.com)

view all 10,983 comments

imoumaima @youssefchorfi

flawlessfashionstore ldk if shes getting paid for this and do not care. But it is safe for mom & baby. I called my doctor because i couldn't even keep water down.

## Appendix 5

### The patent-based innovation system has been globalized

The patent system is a social policy tool to encourage innovation for the benefit of society as a whole. Governments grant patents to innovators as a reward for an innovation when it is useful, new, non-obvious, and described in a manner that people of skill in the relevant field can understand. A patent holder can prevent others from using the innovation for a defined period, and thus recoup investments. Society can then benefit from the disclosure of the innovation and its wider application.

However, patents are often granted at a stage when little is known about the medical usefulness of a product, and patents are awarded irrespective of whether the innovation is important or trivial. Patents can also hamper innovation by excluding others from doing research on the patented subject matter or from accessing research tools.

With the creation of World Trade Organization (WTO) in 1994 and the accompanying Agreement on Trade Related Intellectual Property Right (TRIPS), the patent-based innovation system became globalised. TRIPS sets global minimum requirements for the creation and protection of intellectual property (IP), enforceable through WTO, thus introducing medicines patents in many countries that had not previously granted them. Since the adoption of TRIPS, regional and bilateral trade agreements have further expanded the reach of the IP-based system (see below).

A company that holds a patent has a *de facto* monopoly for a certain period of time because no-one else can bring the patented product to market, unless authorised by the patent holder or the government. The price of a patented product can be set by the patent holder and usually far exceeds the actual cost of production. For example, the cost of production of the 12-week hepatitis C treatment with sofosbuvir is estimated at between US\$ 68 and US\$ 136<sup>1</sup>, while the company sells it in the US for up to US\$ 84 000.<sup>2</sup> South Africa pays over US\$ 3227 per patient per month for branded imatinib, while in India, where the product is not patented, the generic equivalent is priced at US\$ 170 per patient per month.<sup>3</sup>

Flexibilities in patent law enabled by the TRIPS Agreement and the WTO Doha Declaration on TRIPS and Public Health of 2001 have been used by a number of countries to secure access to generic medicines. The most frequently deployed flexibilities are compulsory licensing of medicines, government use of patents, and the “LDC waiver” which grants Least-Developed Countries (LDCs) the right to not grant or enforce medicines patents and test data protection until 2033.

### Free trade agreements restrict access to generic medicines

The plethora of trade agreements containing TRIPS-plus provisions that have been concluded in the last decade, including after the adoption of the Doha Declaration on TRIPS and Public Health, are a serious threat to the policy space TRIPS flexibility provides. The US and the EU are systematically seeking higher levels of IP protection in agreements with countries, which affect access to medicines and seriously hamper the full implementation of the Doha Declaration. This is a failure of State parties to take into account their human rights obligations regarding the right to health when entering into bilateral or multilateral agreements with other states.<sup>4</sup>

The following “TRIPS-plus” provisions regularly feature in trade agreements and form part of the negotiating objectives of the US and/or the EU in trade talks. All of these TRIPS-plus features can delay the introductions of generic medicines and thereby affect access to medicines:

- *Patent linkage*: prohibits granting of marketing approval by national medicines regulatory authorities during the patent term without the consent of the patent holder, creating a new function for health authorities in the enforcement of patents on medicines;
- *Data exclusivity*: prohibits for a certain period of time the use of pharmaceutical test data for medicines regulatory purposes. This delays registration of generics and biosimilars regardless of the patent status of the product;
- *Extension of the patent term*: extending the patent term for pharmaceuticals beyond the 20 years required by the TRIPS Agreement;<sup>5</sup>
- *Extension of the scope of patent protection*: allowing patents on known substances for each “new use”;

- *Restrictions on the grounds for compulsory licensing*: contravening the Doha Declaration on TRIPS and Public Health which says that countries are free to determine the grounds for CL;
- *Restrictions to parallel importation*: importation without the consent of the patent holder is specifically allowed under WTO rules.

Some or all of these provisions appear in concluded agreements, such as the Central American Free Trade Agreement (CAFTA),<sup>6</sup> the US-Singapore Free Trade Agreement, the US-Chile Free Trade Agreement, the US-Morocco Free Trade Agreement, US-Peru Trade Promotion Agreement and other agreements that have already been signed such as NAFTA (US, Canada and Mexico). The TRIPS-plus provisions are also included in accession agreements with new WTO members, for example China and Cambodia. Many TRIPS-plus provisions can also be found in the recent Trans Pacific Partnership Agreement (TPPA), which is promoted as the new set of global trade rules. The TPPA's IP chapter is expected to become the template for future trade agreements.<sup>7,8</sup>

The drive for ever-higher levels of IP protection through trade agreements should be stemmed and will likely require intervention at the multilateral level. International access to medicines policies have always benefitted from more inclusive, multilateral negotiations where the needs of LMICs take a more central place. Examples include the Doha Declaration on TRIPS and Public Health and the special patent waivers for LDCs, both a result of talks at the WTO.

## Appendix 5 – Reference List

1. Hill A, Khoo S, Fortunak J, Simmons B, Ford N. Minimum costs for producing hepatitis C direct-acting antivirals for use in large-scale treatment access programs in developing countries. 2014. Clin Infect Dis. 58(7):928-36.
2. LaMattina J. Even at \$900 (vs. \$84,000 in US) Hep C Cure Sovaldi's Cost Could be Unacceptable in India. Forbes. 8 Aug 2014. Accessed 28 February 2016 at: <http://www.forbes.com/sites/johnlamattina/2014/08/08/even-at-900-per-cure-sovaldis-cost-could-be-unacceptable-in-india/>.
3. 't Hoen, E. A victory for global public health in the Indian Supreme Court. J Pub Health Pol 2013; 34 (3): 370-374.
4. General Comment nr 14, paragraphs 48 and 50. In: New York: Economic and Social Council, 2001. Official records of 22nd, 23rd and 24th sessions. Document e/2001/22; E/C.12/2000/22, pp 128-148.
5. European Commission. Protection of Intellectual Property in Free Trade Agreements. October 2012. Accessed 28 February 2016 at: [http://trade.ec.europa.eu/doclib/docs/2012/november/tradoc\\_150081.pdf](http://trade.ec.europa.eu/doclib/docs/2012/november/tradoc_150081.pdf).
6. CAFTA originally included Costa Rica, El Salvador, Guatemala, Honduras and Nicaragua, but the Dominican Republic agreed in March 2004 to sign on to CAFTA as well. Reference: Office of the United States Trade Representative. CAFTA-DR (Dominican Republic-Central America FTA). Accessed 28 February 2016 at: <https://ustr.gov/trade-agreements/free-trade-agreements/cafta-dr-dominican-republic-central-america-fta>.
7. UNITAID. The Trans-Pacific Partnership Agreement: Implications for Access to Medicines and Public Health. Geneva: WHO. 2014. Accessed 28 February 2016 at: [http://www.unitaid.eu/images/marketdynamics/publications/TPPA-Report\\_Final.pdf](http://www.unitaid.eu/images/marketdynamics/publications/TPPA-Report_Final.pdf).
8. Van Onselen L. TPP IP chapter "a disaster for global health". Accessed 28 February 2016 at: <http://www.macrobusiness.com.au/2015/10/tpp-ip-chapter-a-disaster-for-global-health/>.



## Appendix 6: Complementary Indicators

| #   | Indicator                                                                                                                                                                                                                  |
|-----|----------------------------------------------------------------------------------------------------------------------------------------------------------------------------------------------------------------------------|
| 2.e | Number of medicines for which children's-appropriate dosages forms have been included per total number of medicines for which dosage form is available on the national essential medicines/reimbursement list <sup>‡</sup> |
| 2.f | Policy in place to manage conflict of interest issues for all members involved in medicines selection/reimbursement decision-making process (yes/no)                                                                       |
| 2.g | Patient OR civil society representation in the medicines selection/reimbursement decision-making process is specifically provided for (yes/no) <sup>‡</sup>                                                                |
| 2.h | Existence of national clinical trial register with requirement for timely publication of trial results (yes/no)                                                                                                            |
| 2.i | Provisions for the publication of summarised clinical trial data submitted to the NMRA (Yes/No) <sup>‡</sup>                                                                                                               |
| 2.j | Provisions for the publication of summarised clinical trial data submitted to selection/reimbursement decision-makers (yes/no)                                                                                             |
| 3.g | Number of domestic pharmaceutical manufacturers assessed as GMP compliant out of total number of domestic pharmaceutical manufacturers                                                                                     |
| 3.h | Patient or civil society organization representation in the NMRA is specifically provided for (yes/no) <sup>‡</sup>                                                                                                        |
| 4.f | Operational budget of the independent national medicines use programme/institute as a percentage of total public pharmaceutical expenditure <sup>‡</sup>                                                                   |
| 4.g | Policy in place to manage conflict of interest issues for all members involved in independent programme/institute (yes/no)                                                                                                 |
| 5.e | Percentage of public financial investment into the development of missing EM out of total public health research expenditure <sup>‡</sup>                                                                                  |
| 5.f | Number of relevant products recently marketed for which effective access strategies have been established (per company)*                                                                                                   |

<sup>‡</sup> New indicator that requires validation.

\* Access strategies should include all LMICs.
